# Supplementary material for: Toward Modeling Context-Specific EMT Regulatory Networks Using Temporal Single Cell RNA-Seq Data
Source: PubMed Central journal article supplement (PMC7190801; doi:10.3389/fmolb.2020.00054), 2020-04-23
Supplement: Presentation_1.pdf [file Presentation_1.pdf]

# **Towards modeling context-specific EMT regulatory networks using temporal single cell RNA-Seq data**

Daniel Ramirez<sup>1</sup>, Vivek Kohar<sup>2</sup>, Mingyang Lu<sup>2</sup>

1 College of Health Solutions, Arizona State University, Tempe AZ

2 The Jackson Laboratory for Mammalian Genetics, Bar Harbor ME

\* equal contributions

**Correspondence:**

Mingyang Lu

[Mingyang.Lu@jax.org](mailto:Mingyang.Lu@jax.org)

Supporting Information

**A**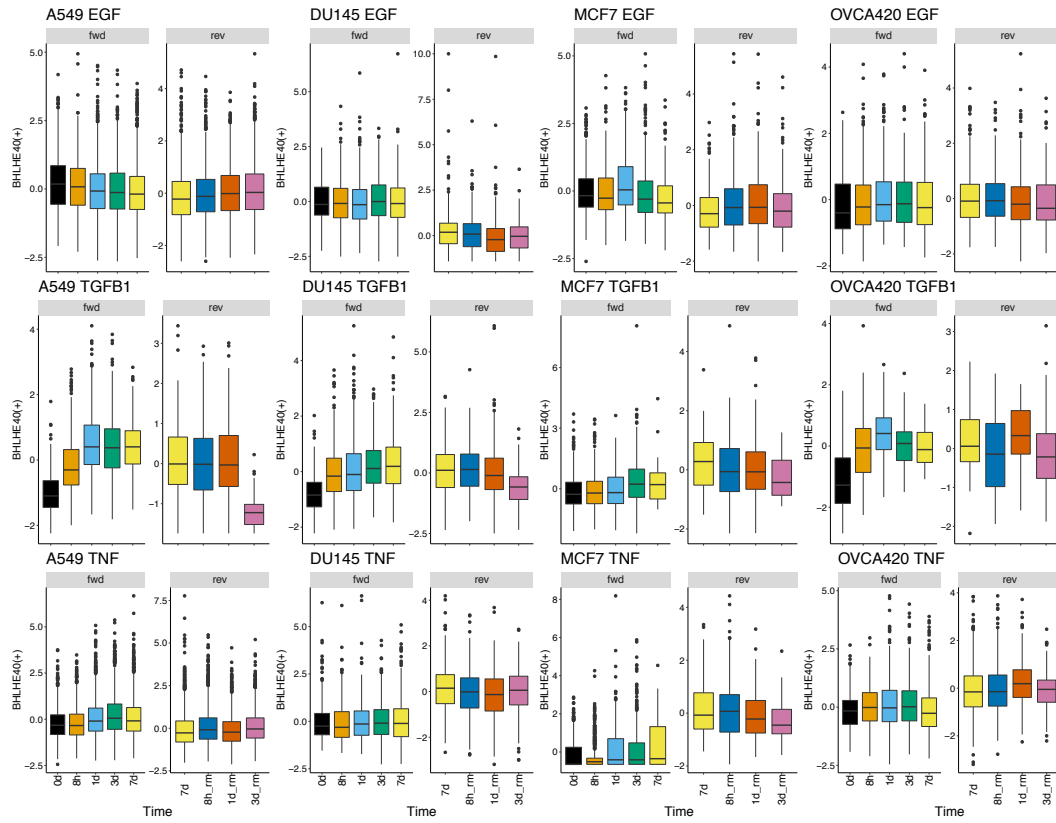**B**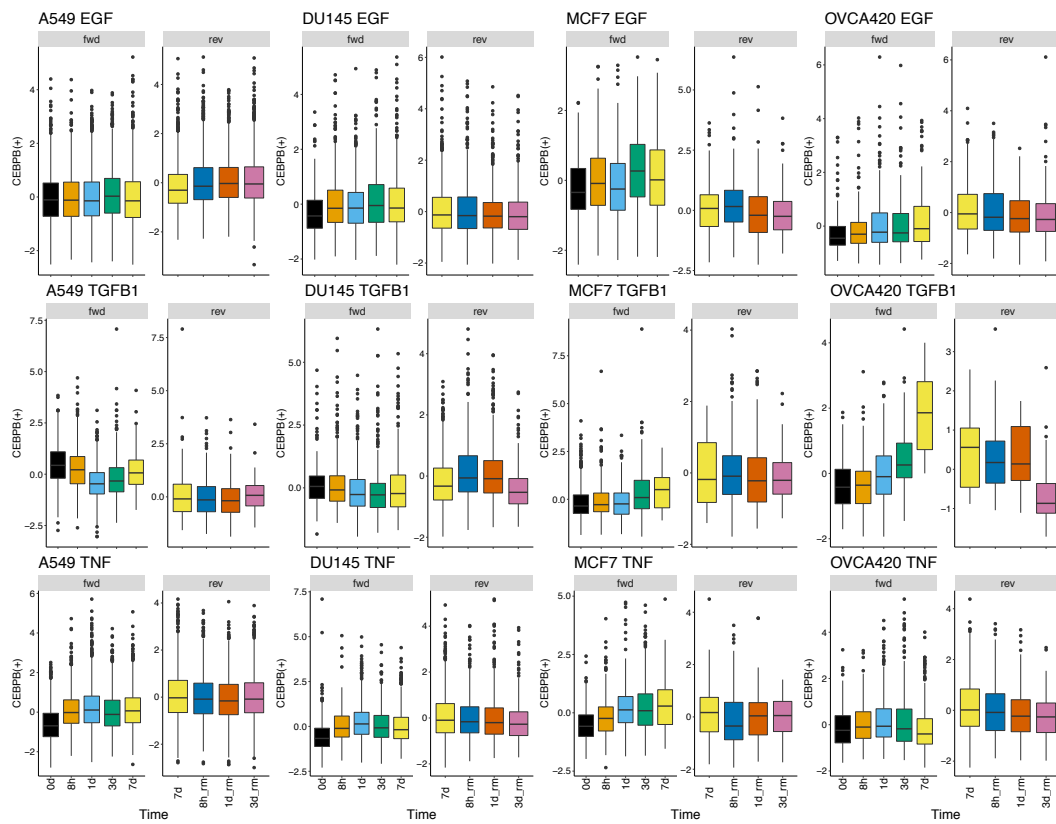

C

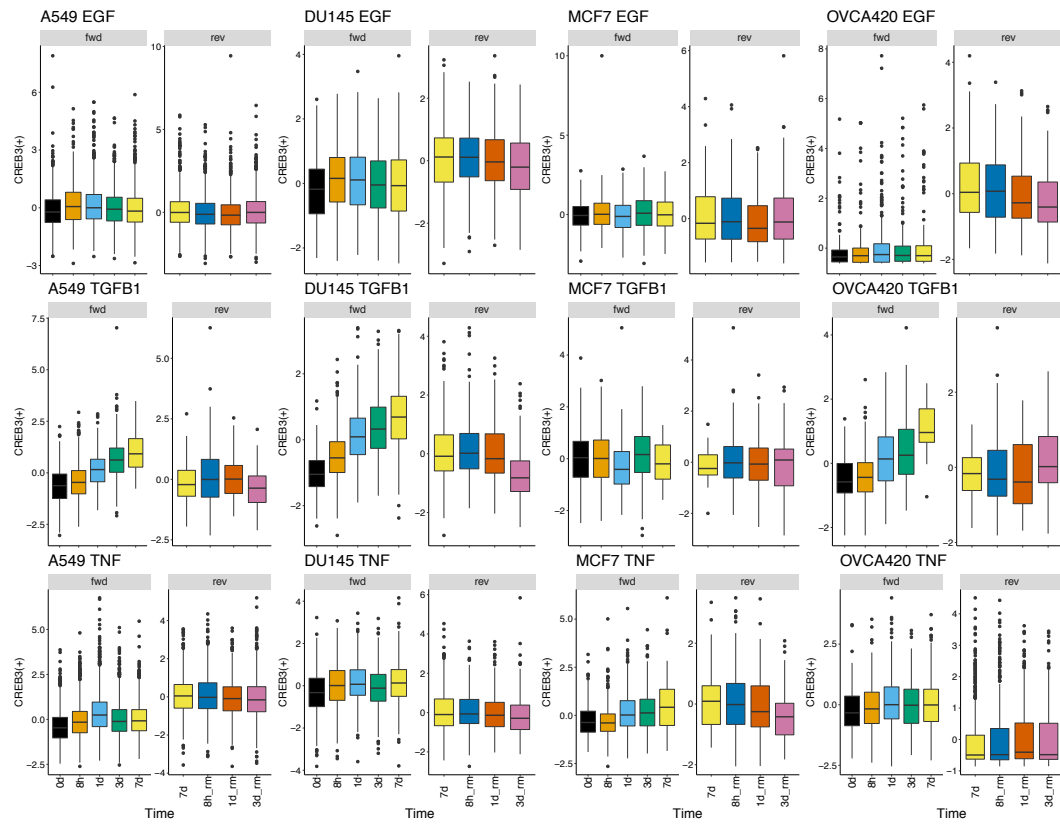

D

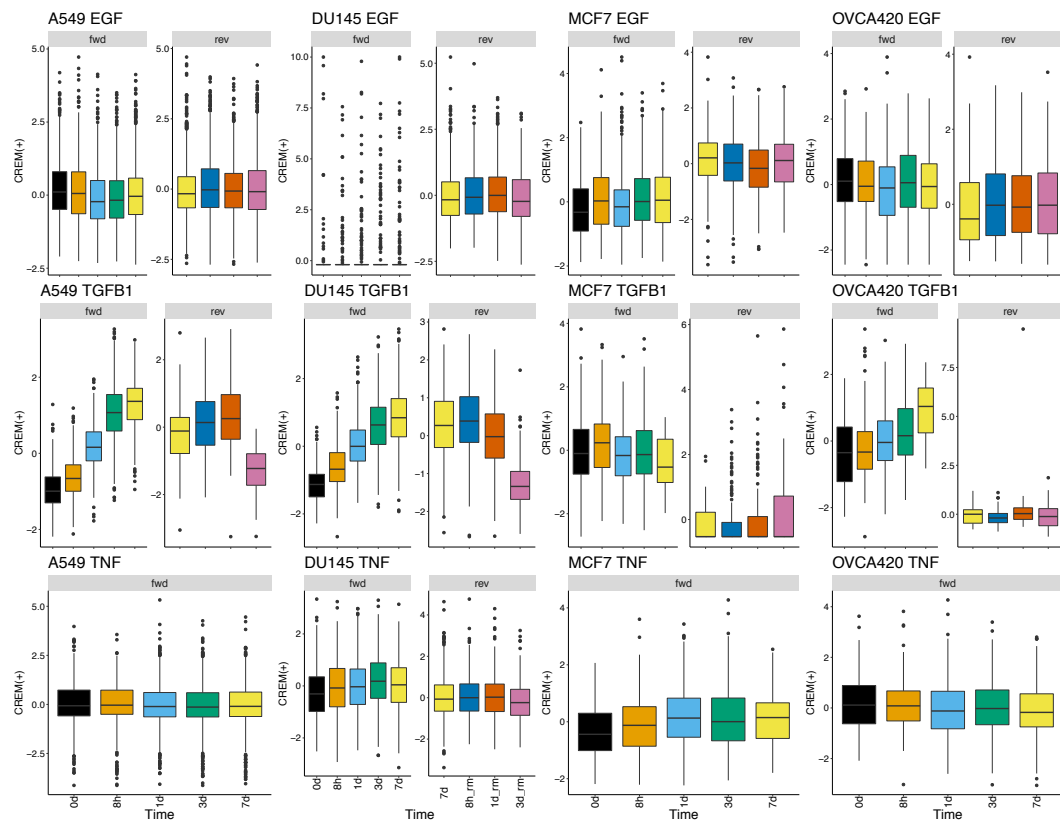

E

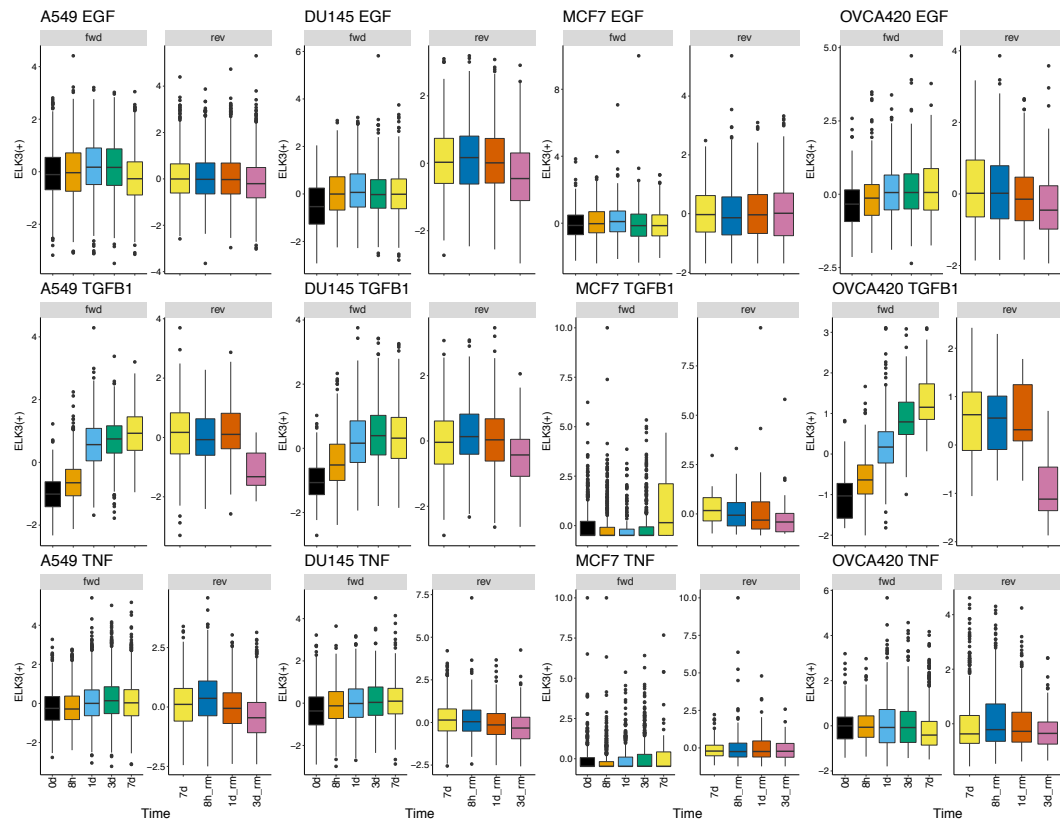

F

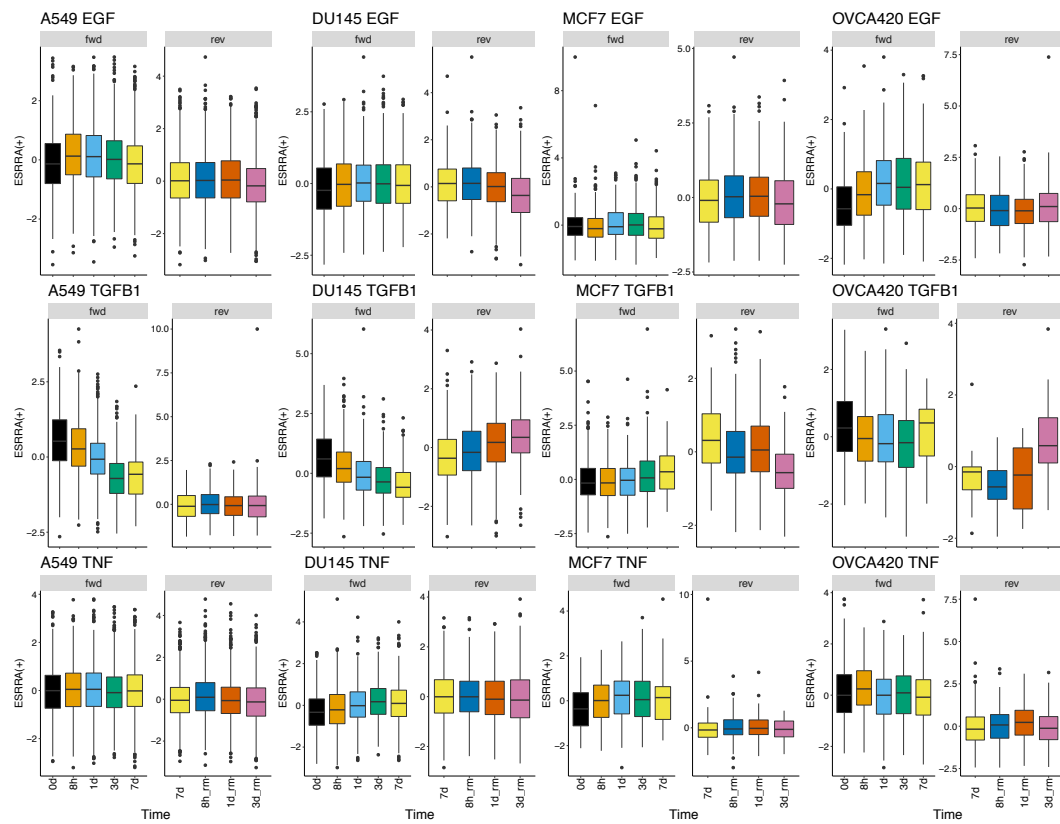



G

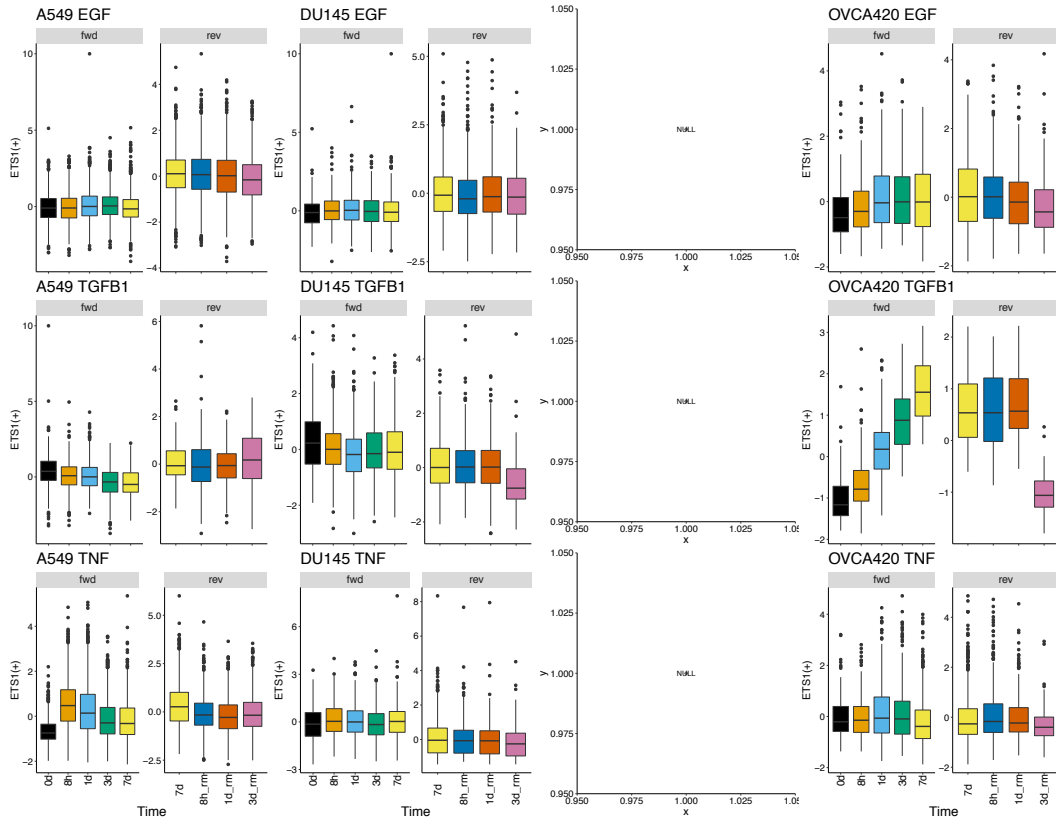

H

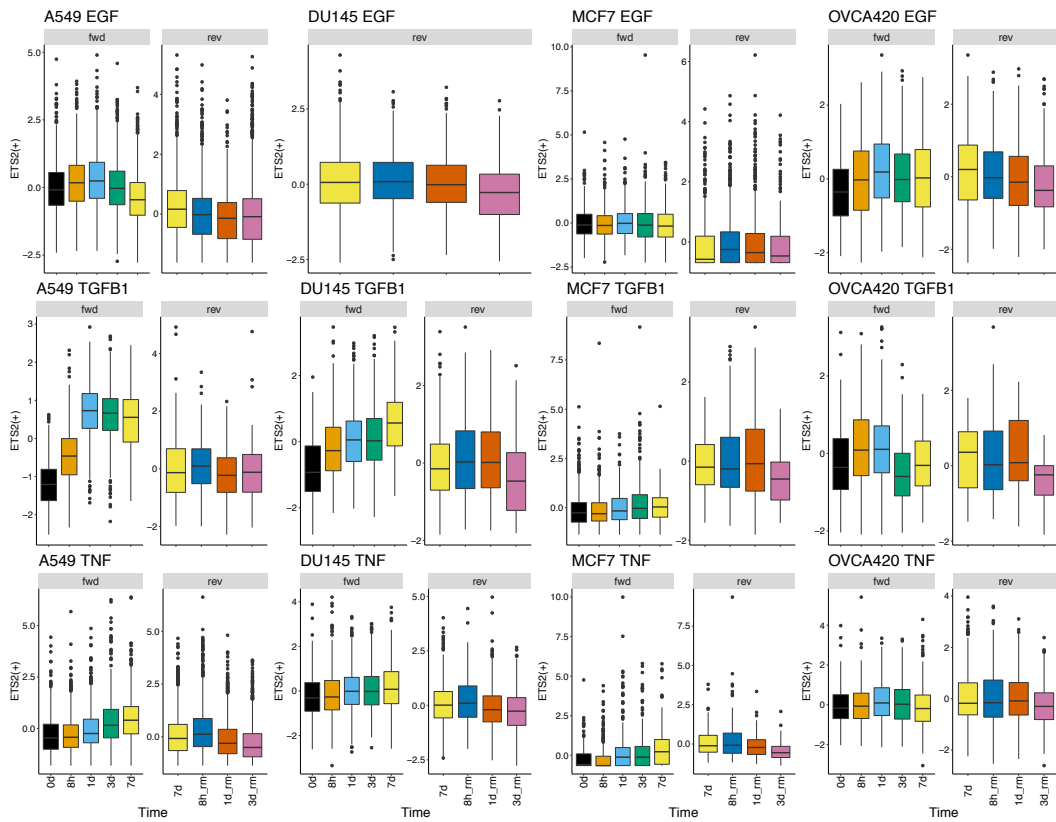

**I**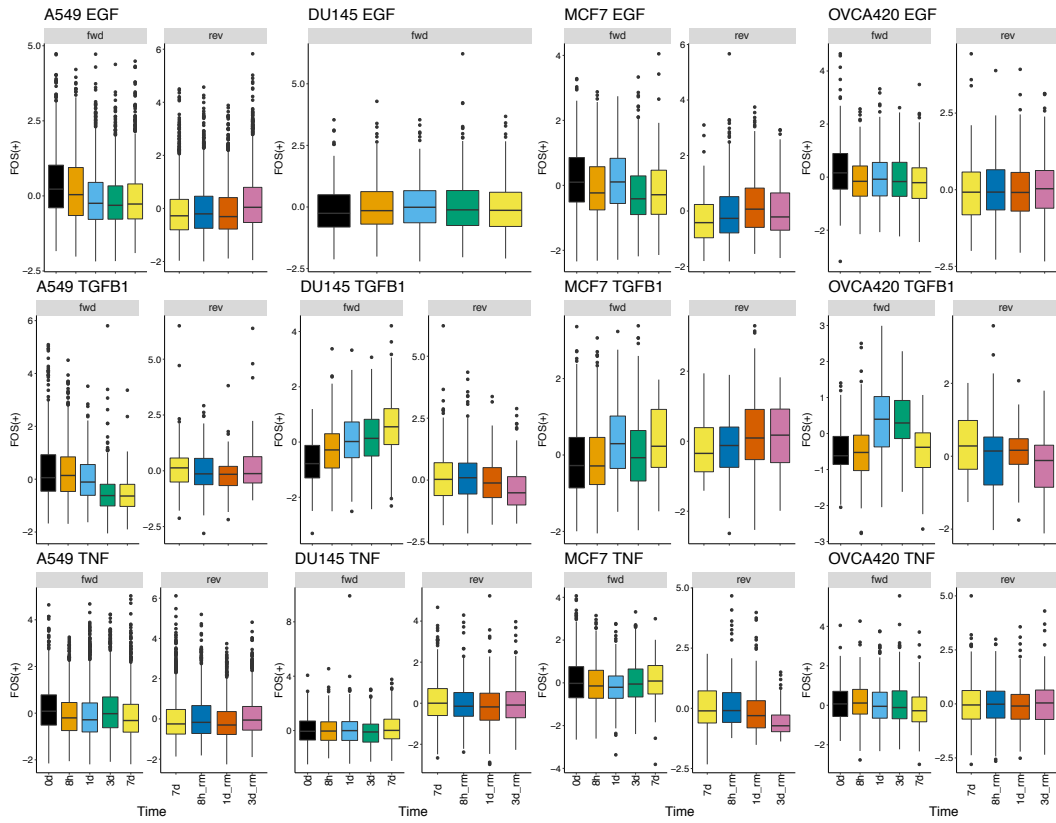**J**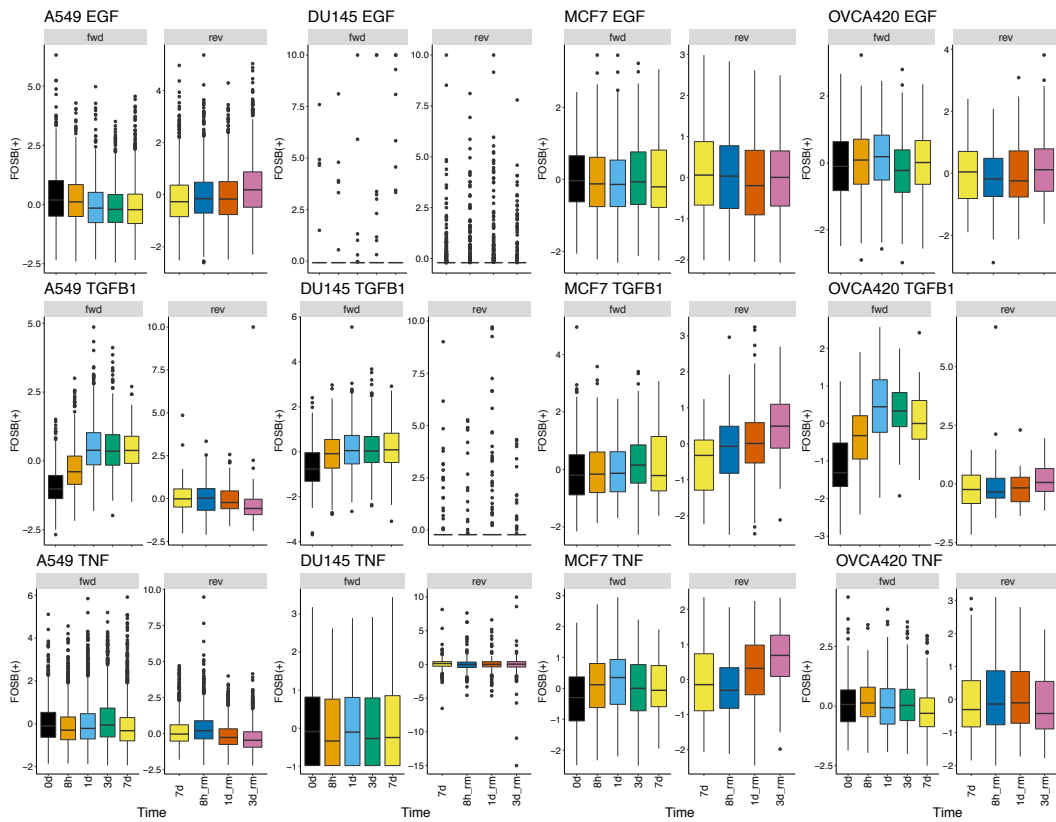

K

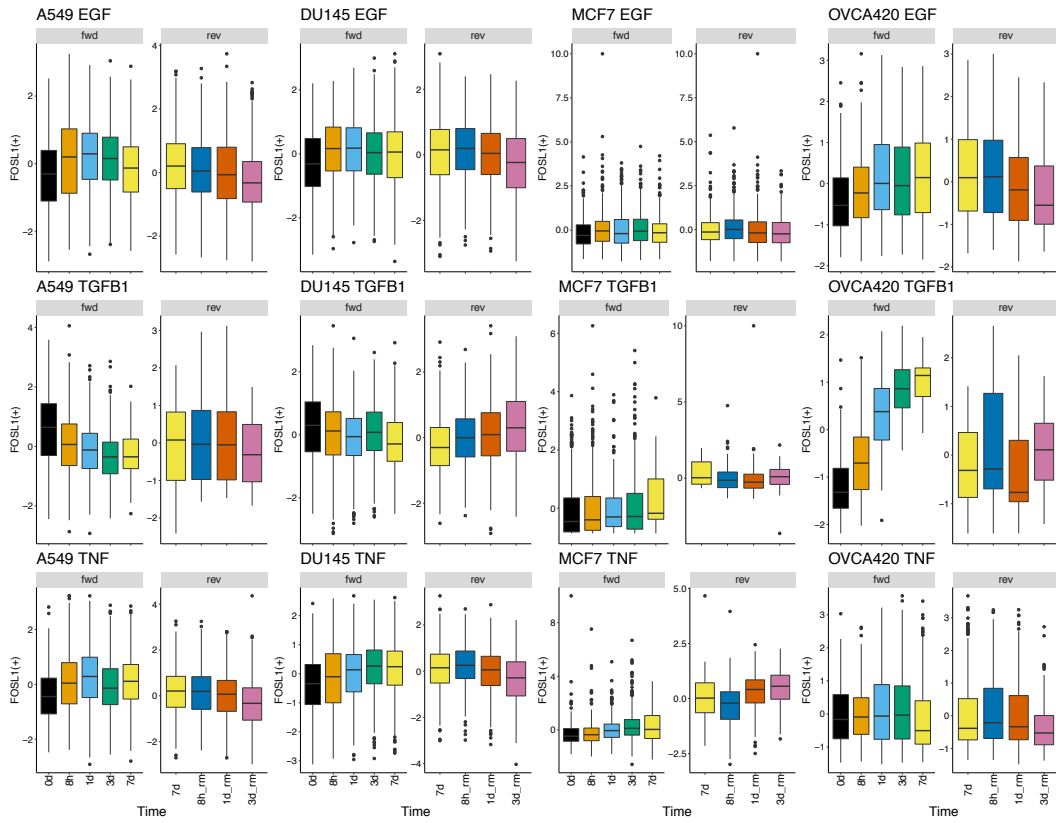

L

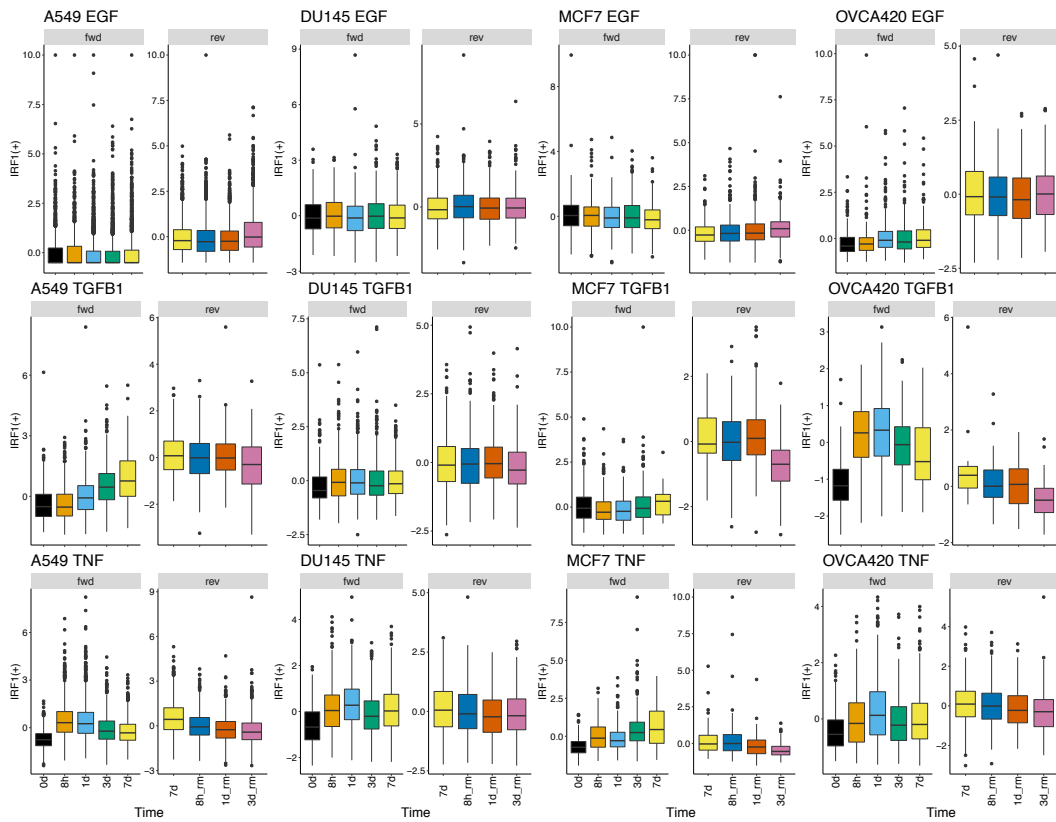

M

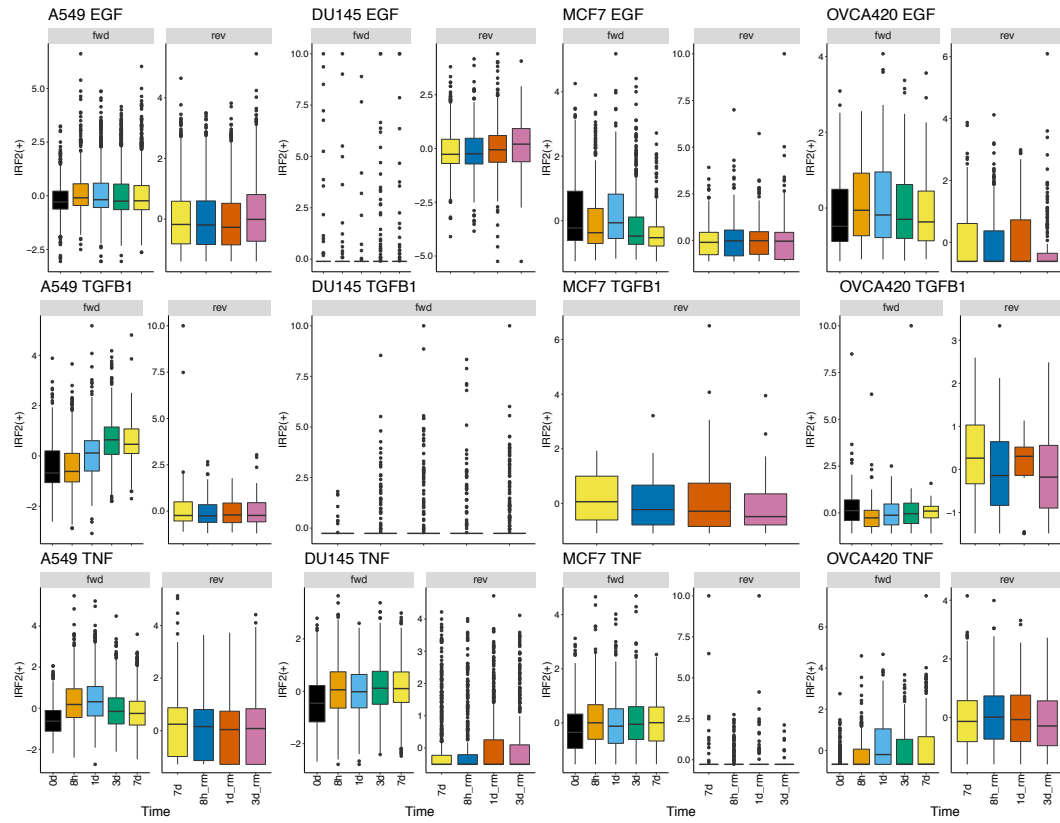

N

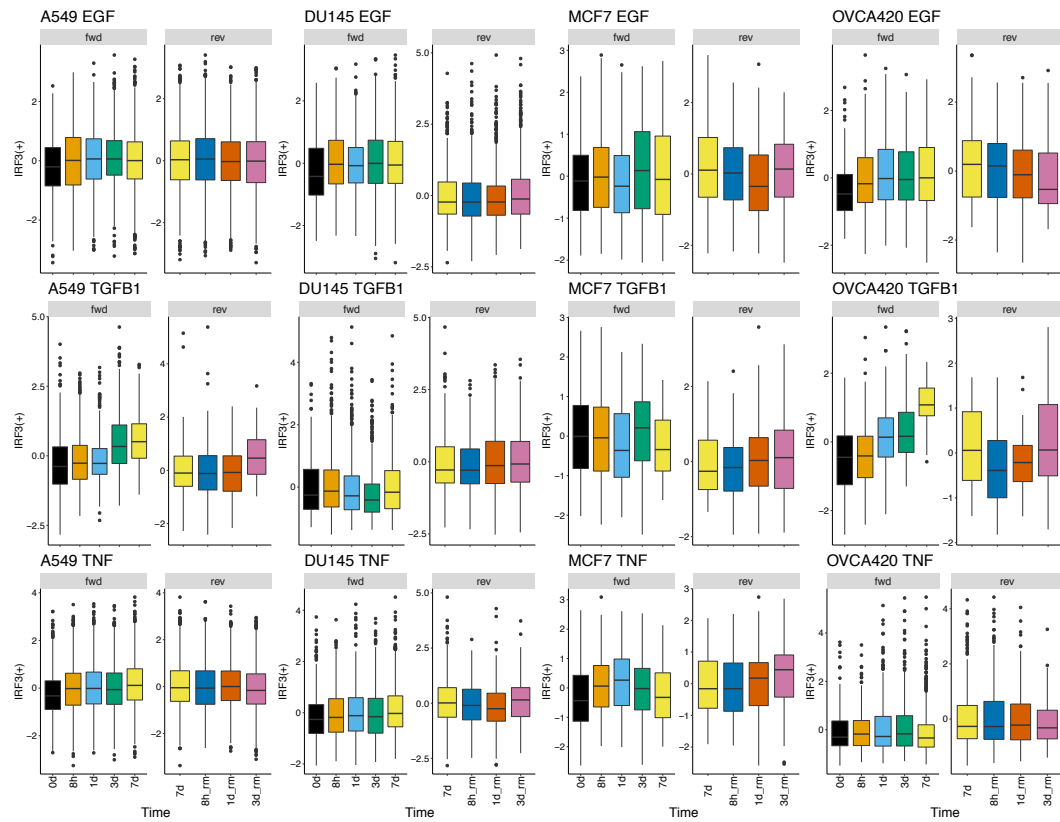

O

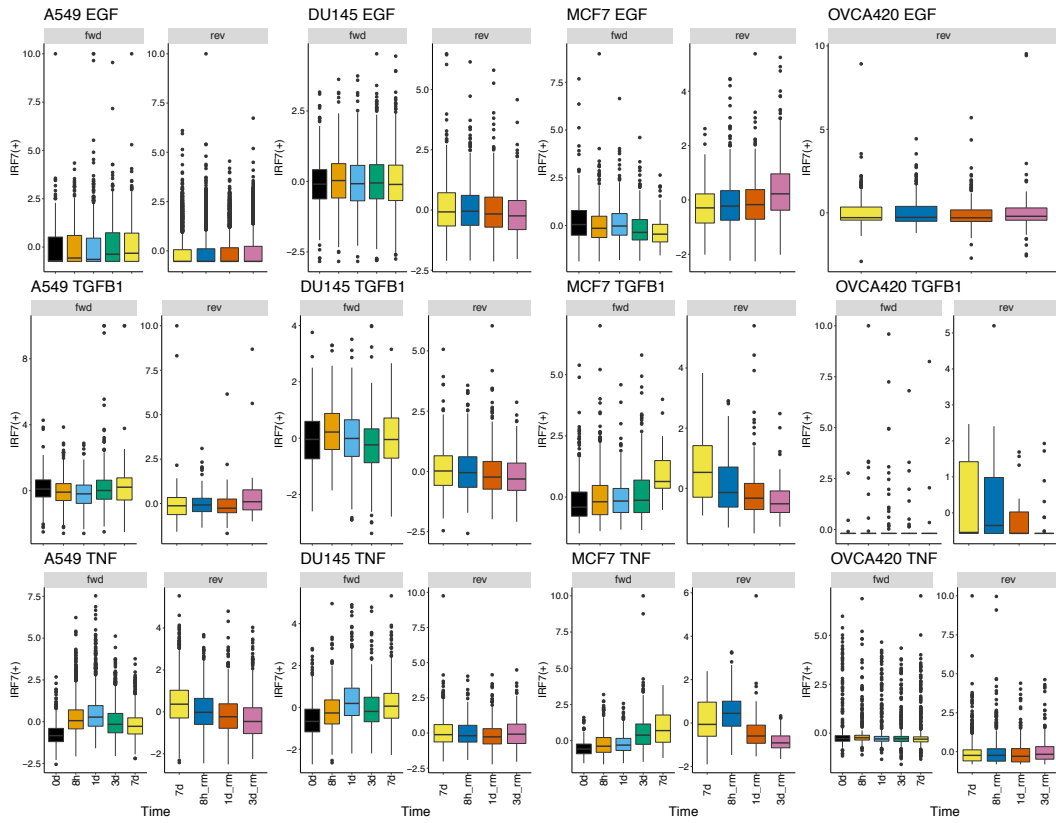

P

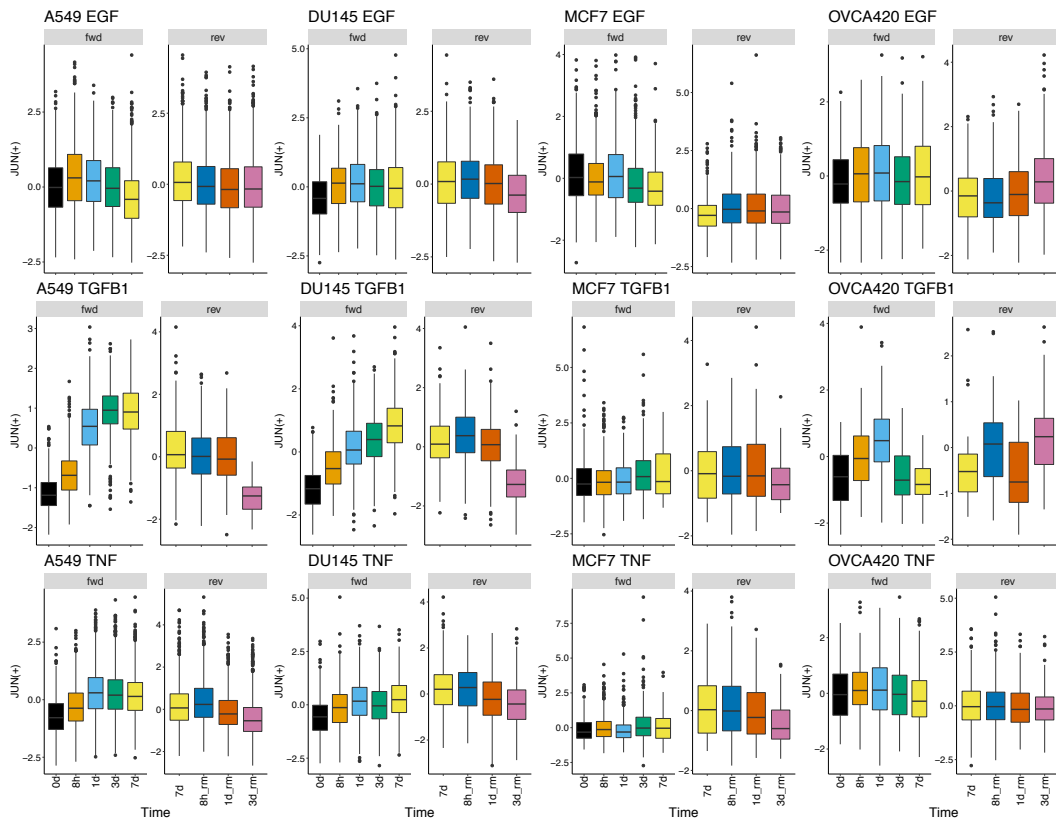

Q

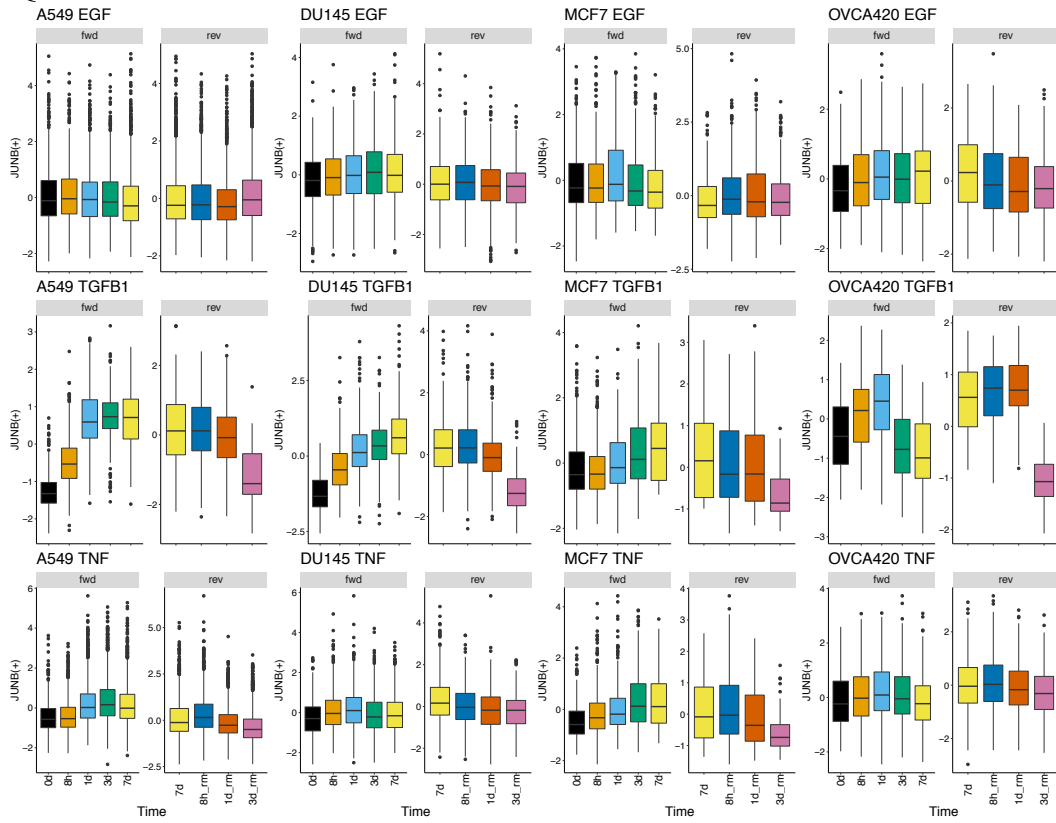

R

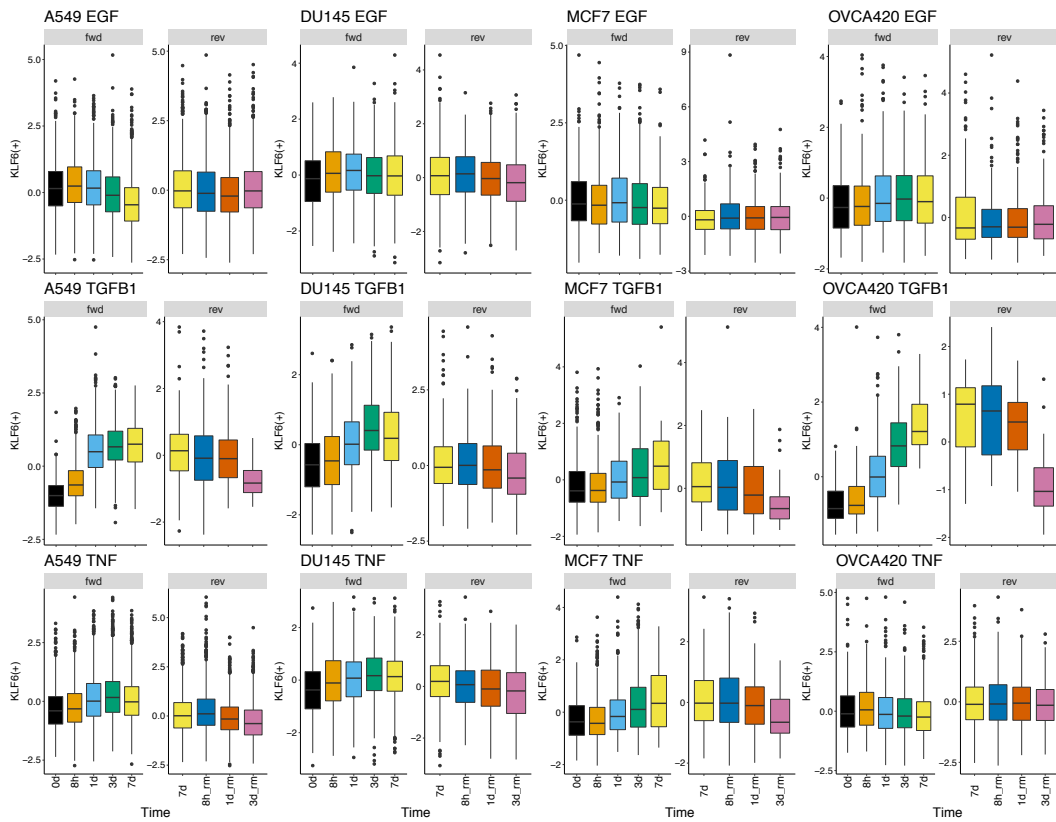

**S**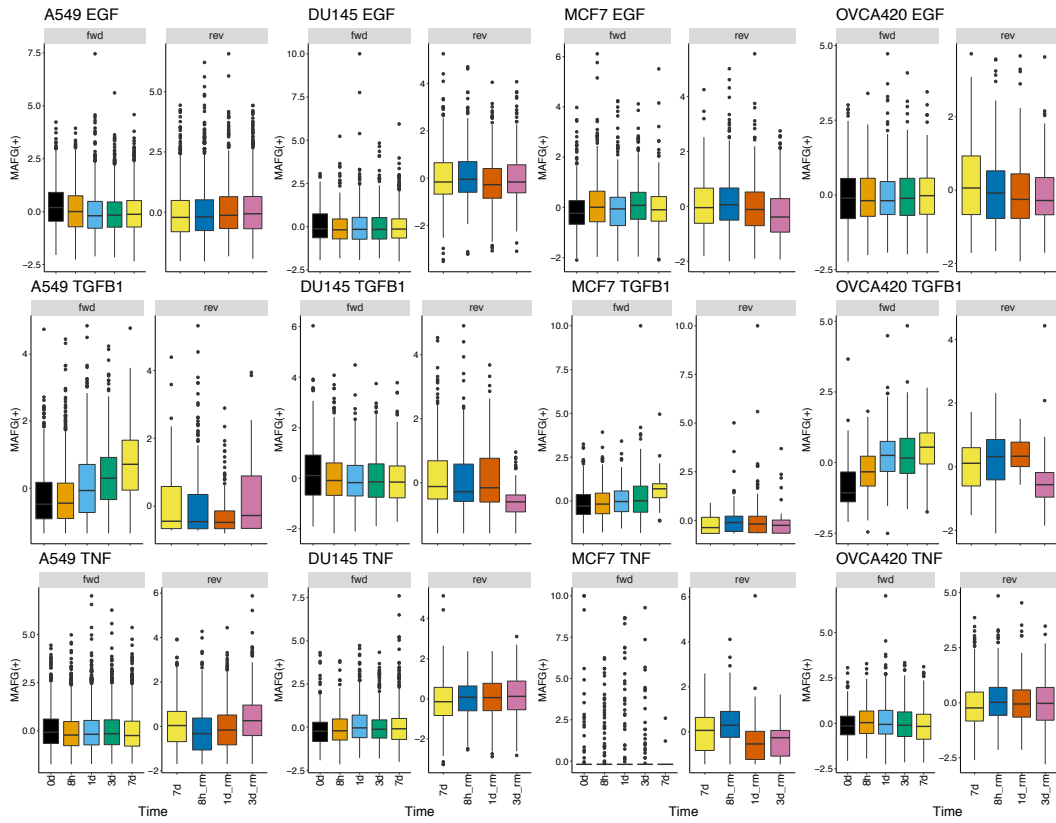**T**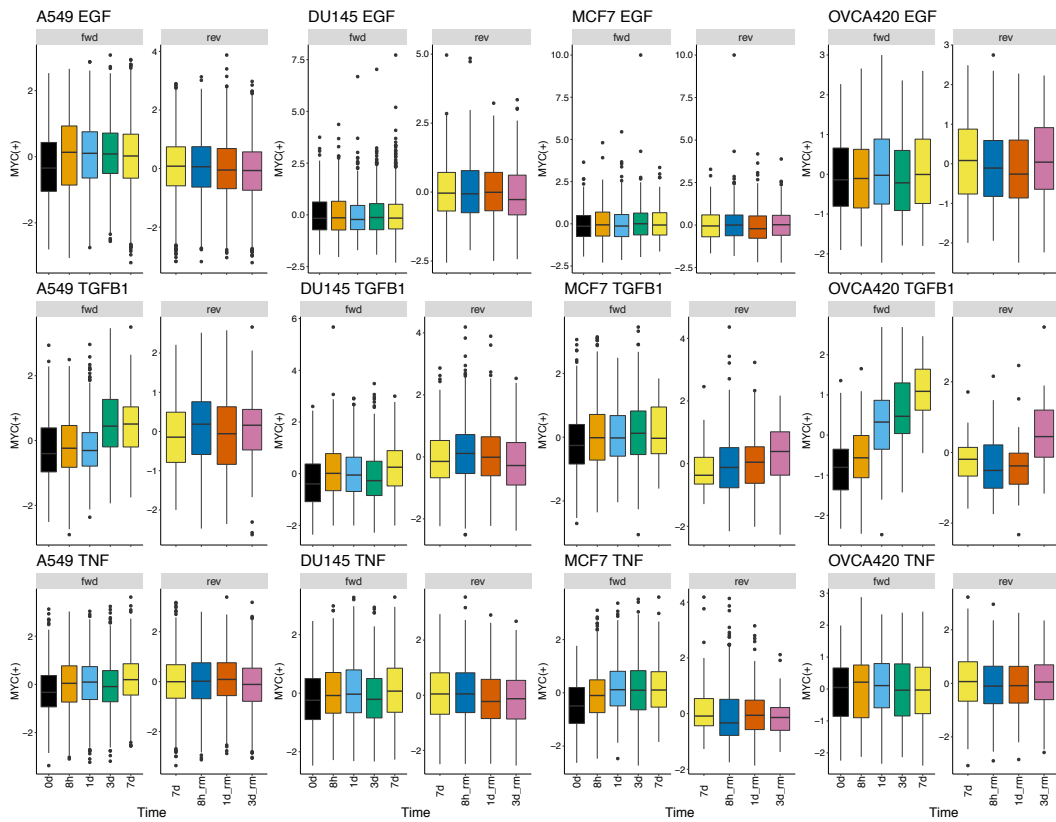

U

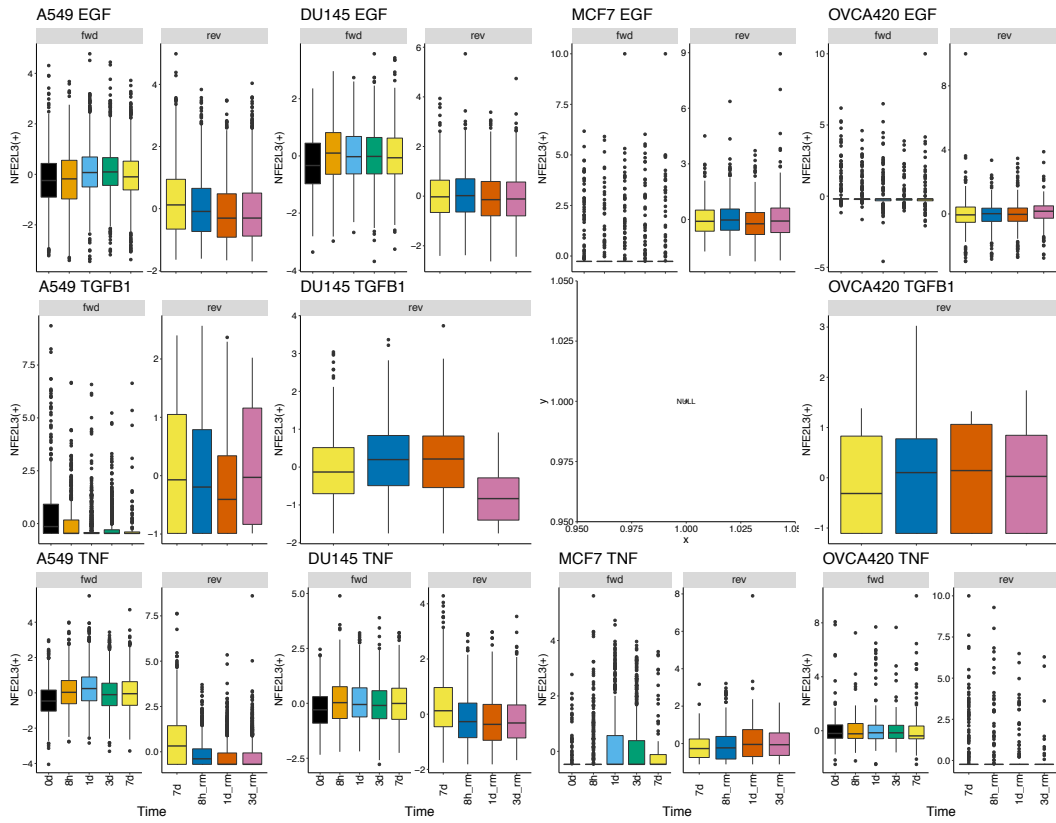

V

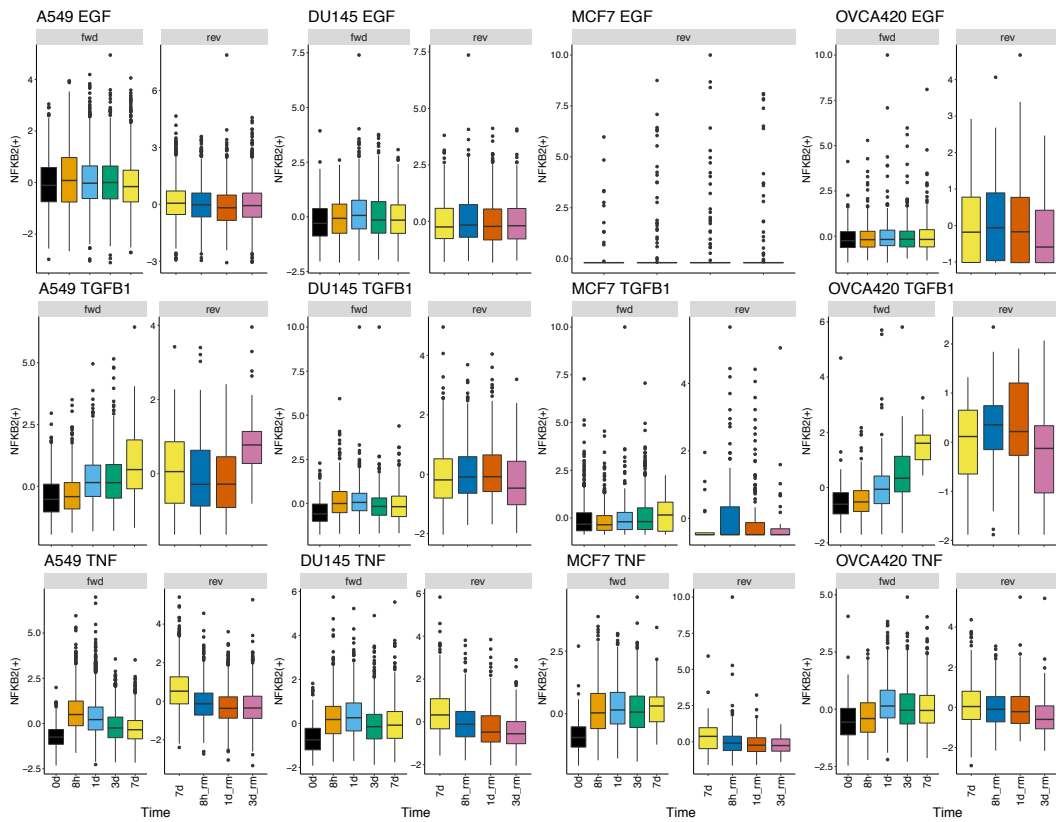



W

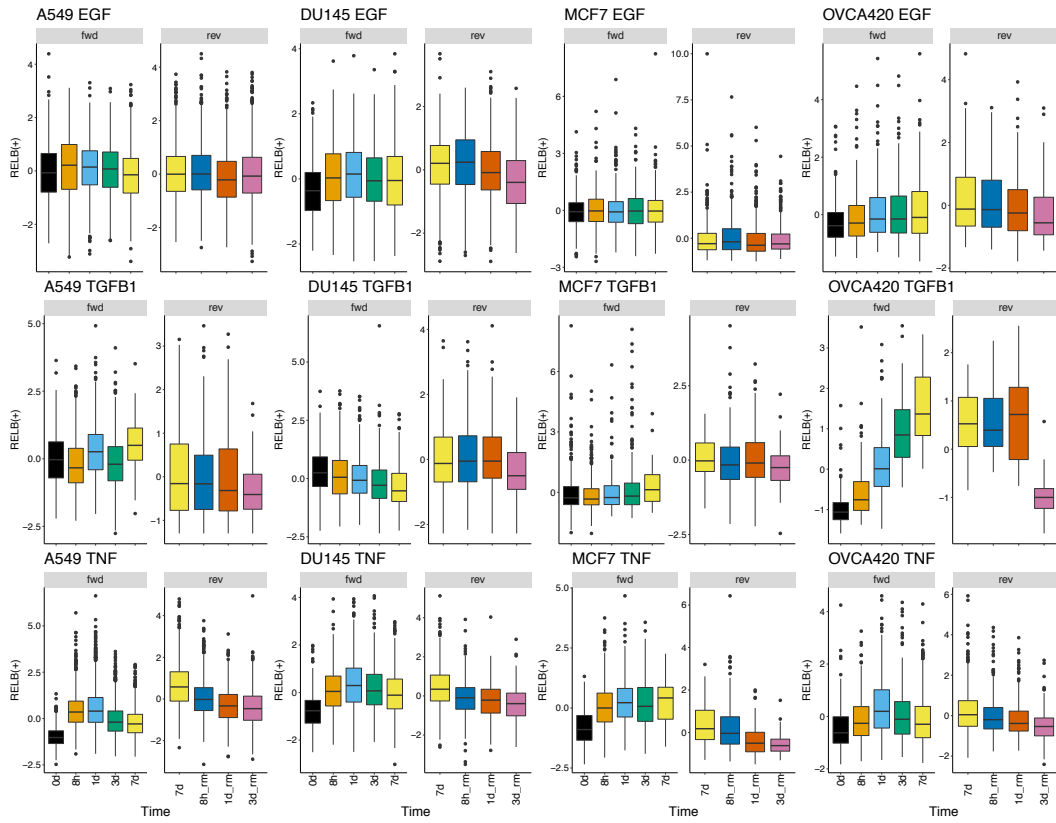

X

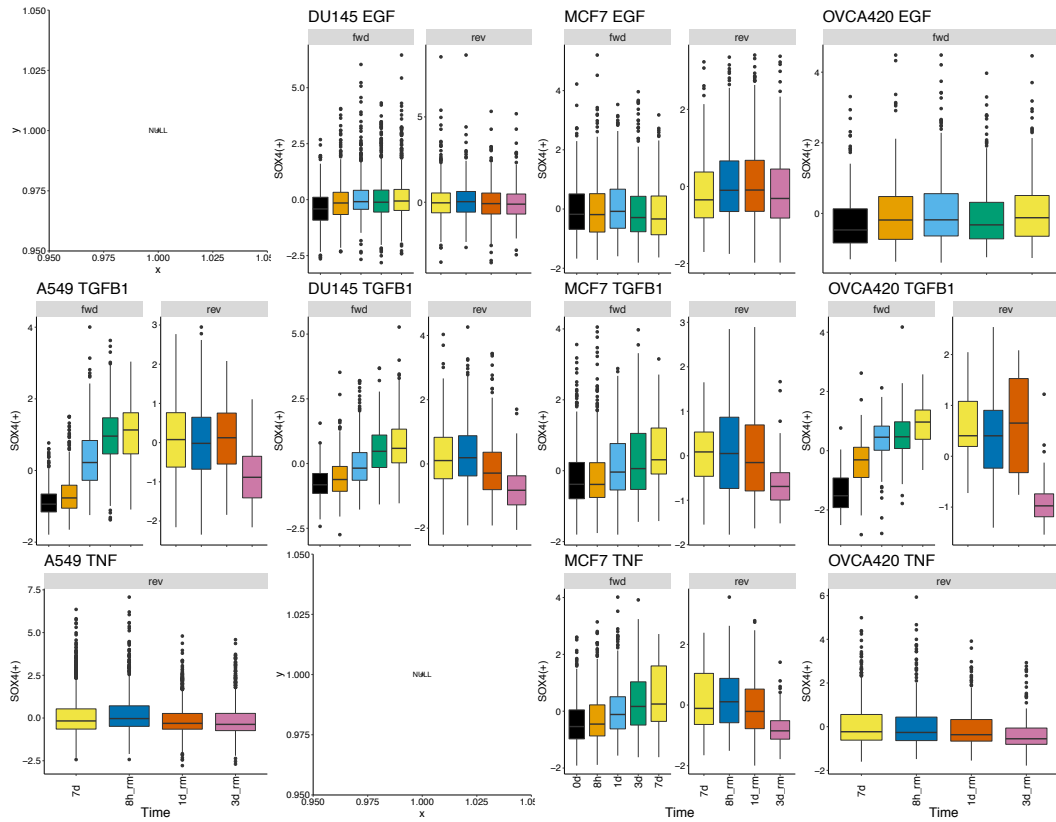

Y

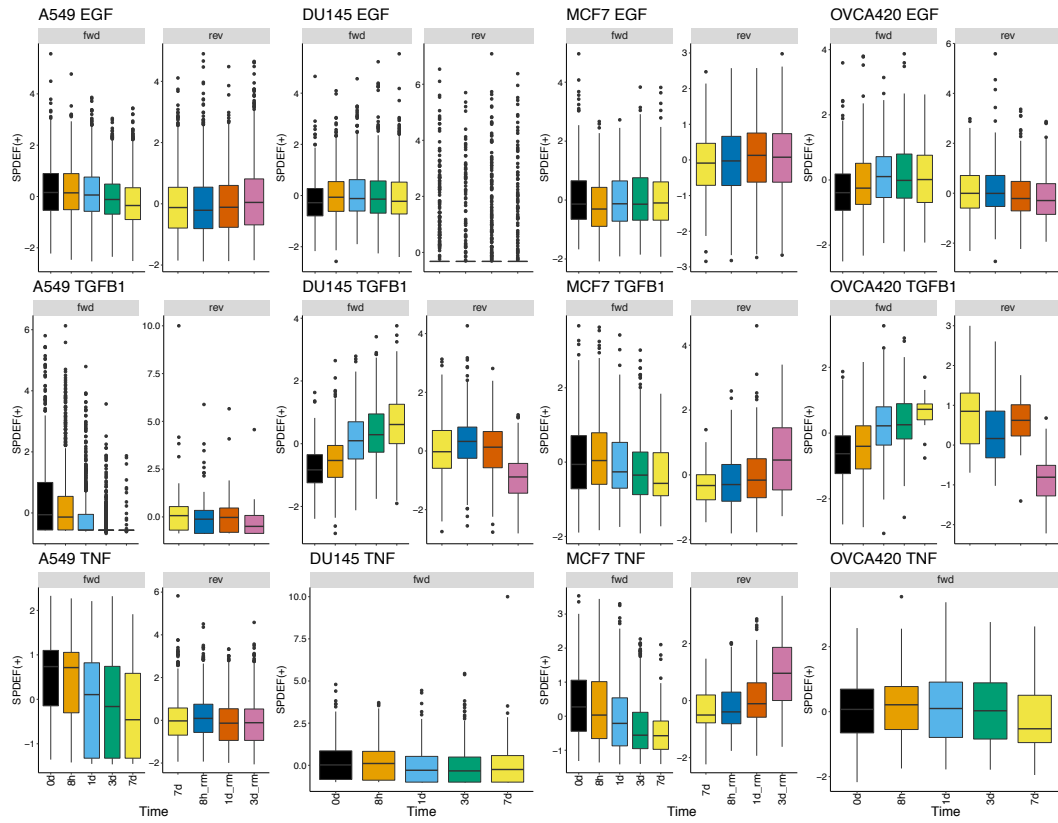

Z

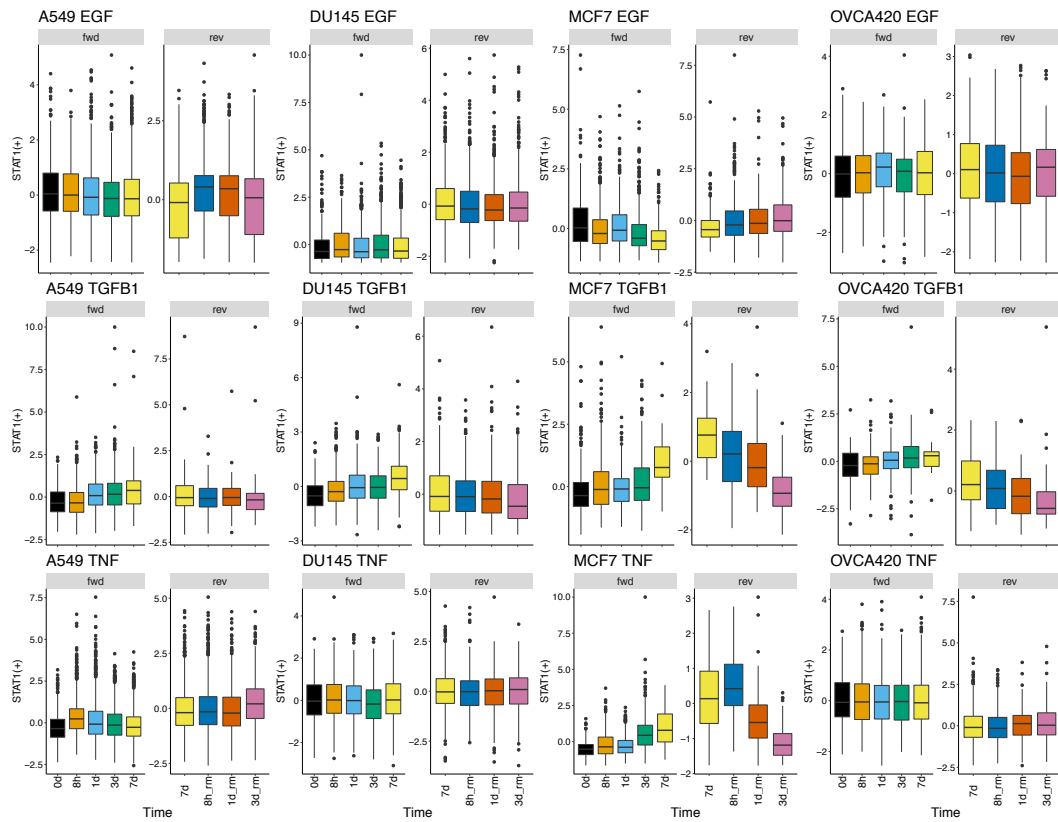

AA

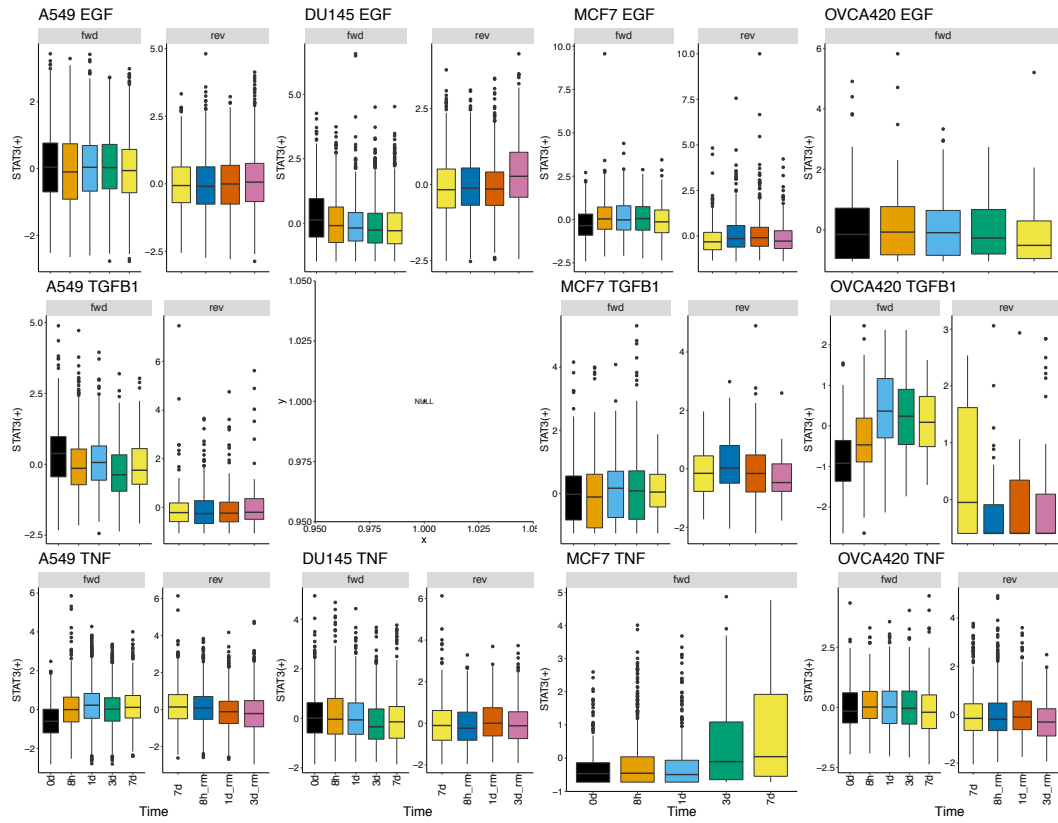

AB

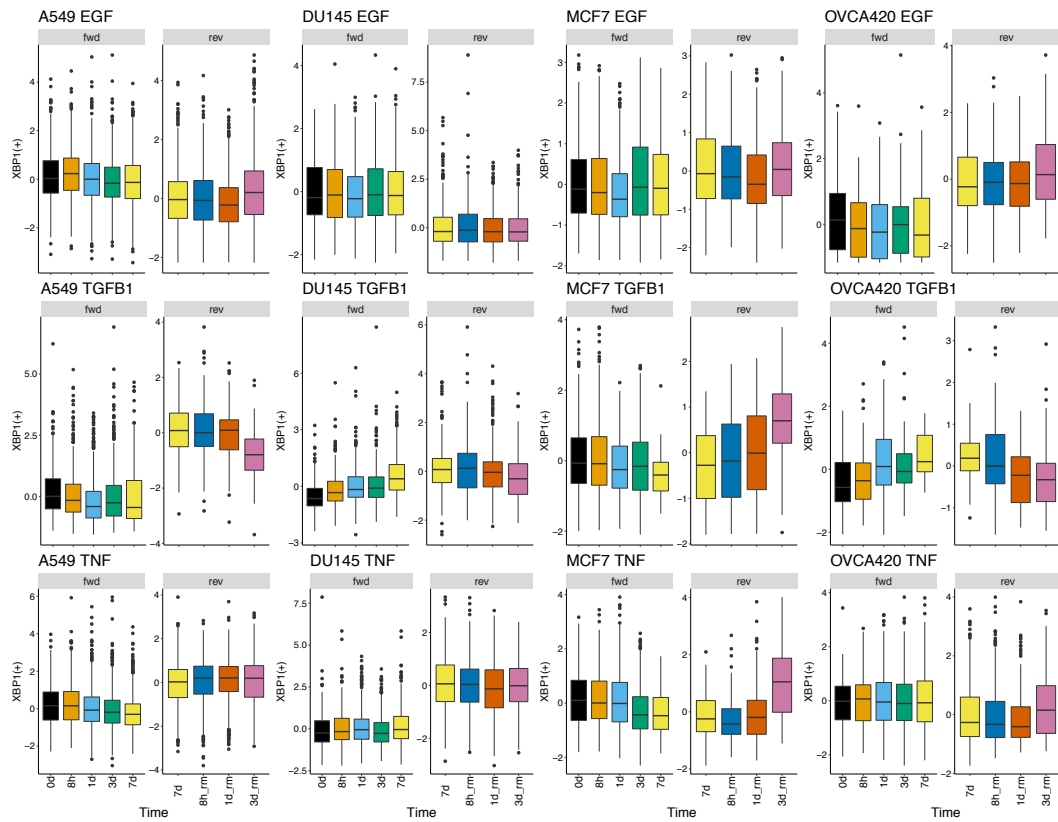

**Figure S1A-AB.** Activity profiles over time of 28 highly conserved TFs across all experimental conditions. Activity values shown are calculated from SCENIC. Box and whisker plots show the middle 50% of activity values within the box with a line indicating the mean value. Whiskers show the top and bottom quartiles and individual points are statistical outliers. Fwd denotes the timepoints after signal induction and rev denotes the timepoints after signal removal. Each panel shows one gene across all 12 experimental conditions. Missing plots indicate that a TF was not identified as a regulon by SCENIC in that experimental dataset.

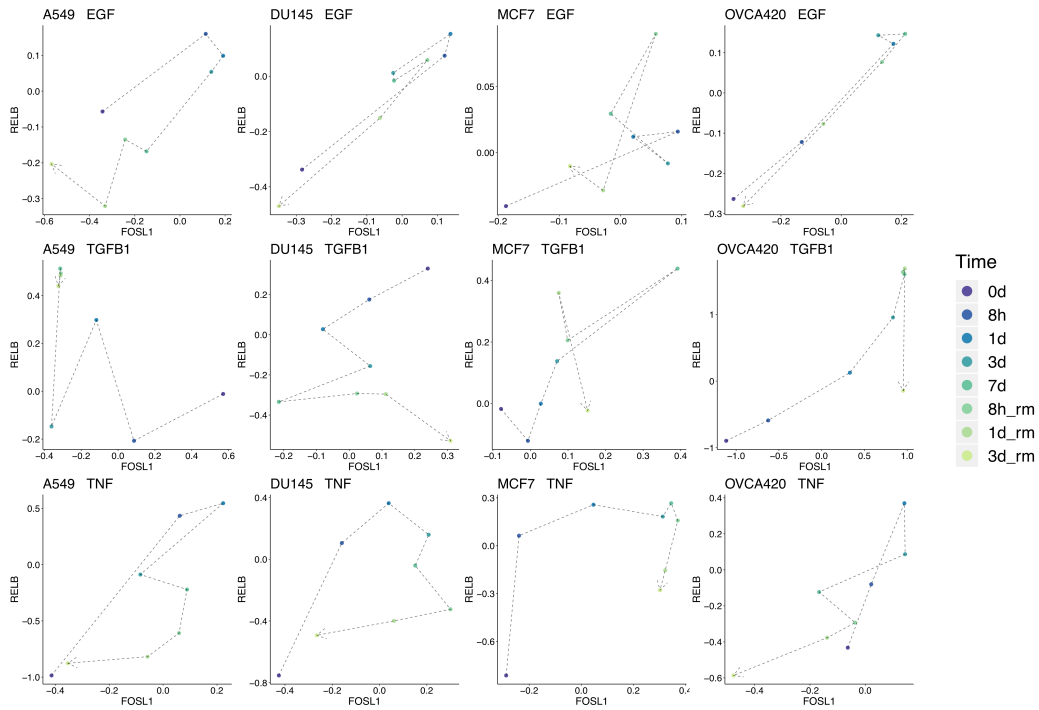

**Figure S2.** Signal chronology across different conditions for alternate gene pairs. Average TF activity of RELB vs FOSL1 for each timepoint. Data from 7d onward is scaled on a linear model to match the 7d distributions for the forward direction. Point color denotes timepoint and chronology is demonstrated with a dashed arrow.

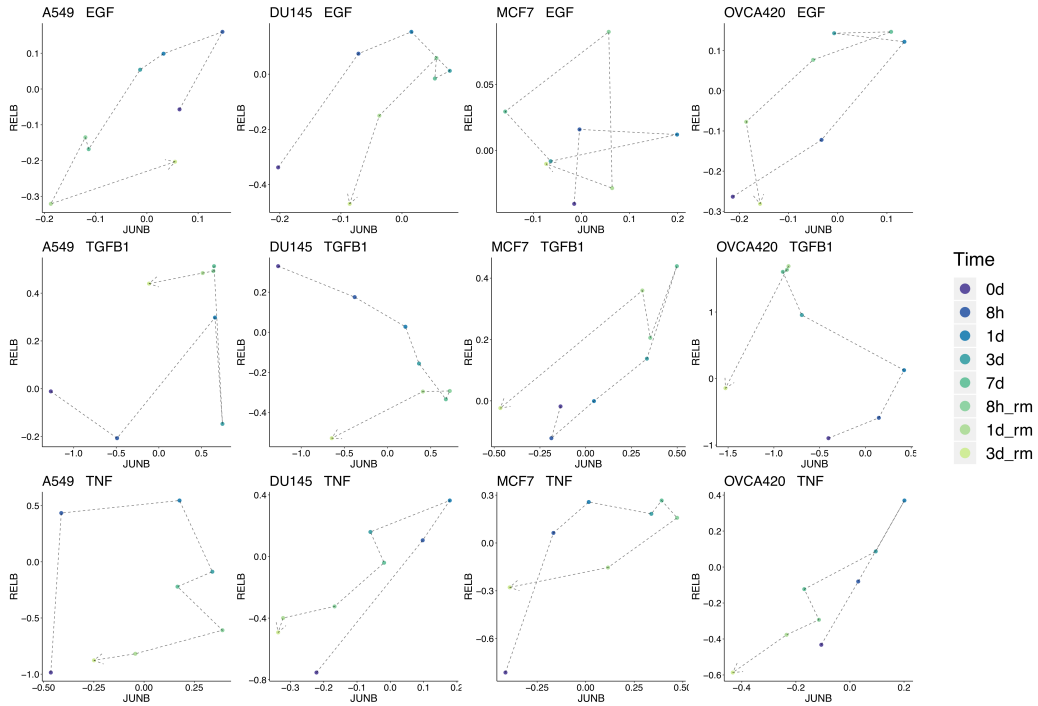

**Figure S3.** Signal chronology across different conditions for alternate gene pairs. Average TF activity of RELB vs JUNB for each timepoint. Data from 7d onward is scaled on a linear model to match the 7d distributions for the forward direction. Point color denotes timepoint and chronology is demonstrated with a dashed arrow.

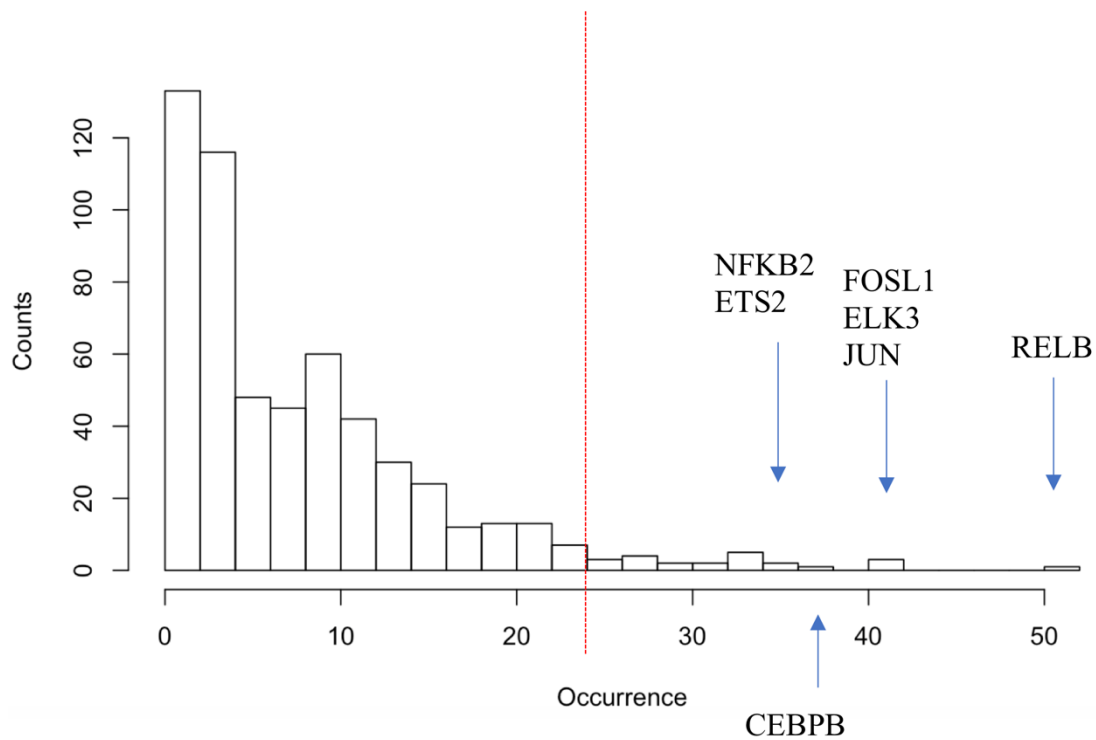

Selected TFs: BHLHE40, CEBPB, CREB3, CREM, ELK3, ESRRA, ETS1, ETS2, **FOS**, **FOSB**, **FOSL1**, IRF1, IRF2, IRF3, IRF7, **JUN**, **JUNB**, KLF6, MAFG, MYC, NFE2L3, **NFKB2**, **RELB**, SOX4, SPDEF, STAT1, STAT3, XBP1

**Figure S4.** Number of TFs featuring as differentially active TFs (DATF) out of 84 comparisons.

For example, RELB appears as a DATF in 52 comparisons. TFs coming up as DATFs in more than 24 comparisons were selected as common TFs. TF names in red indicate AP-1 and NFKB genes, common downstream targets of the EMT inducing signals.

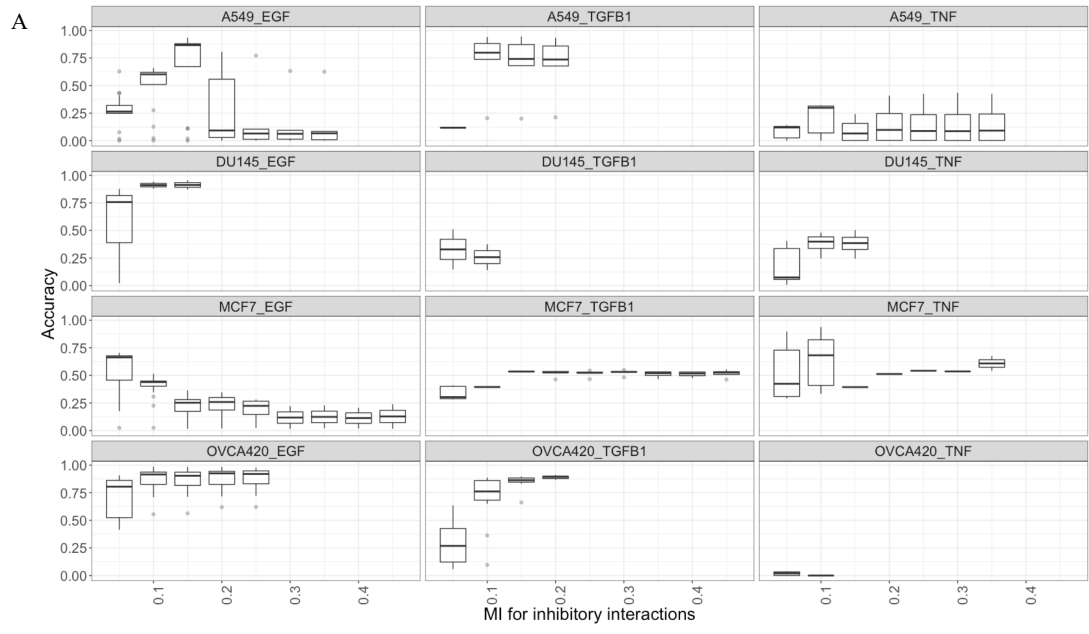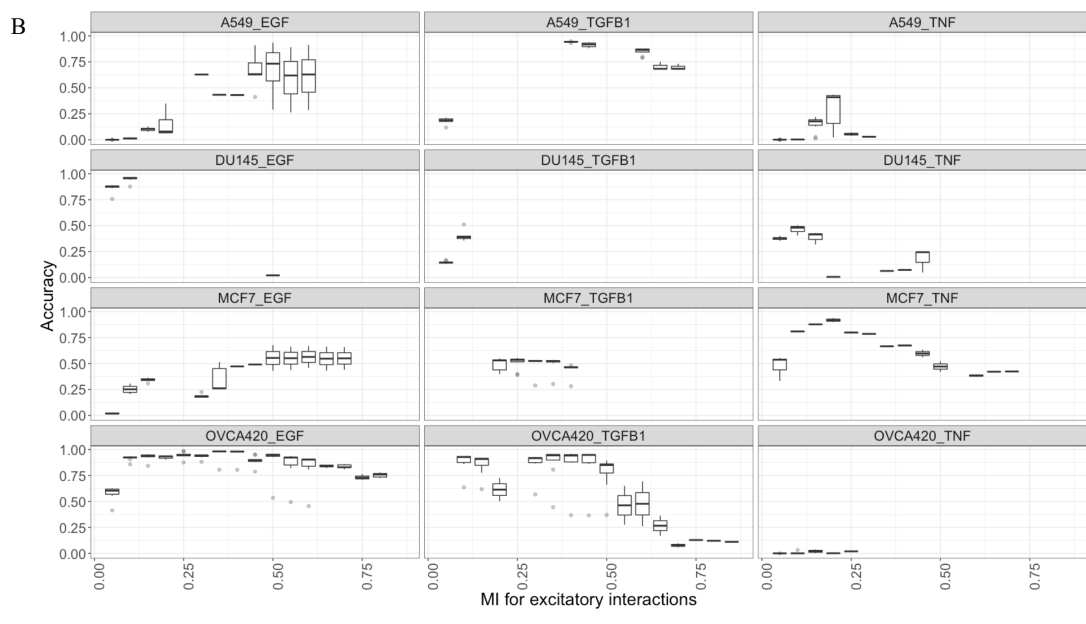

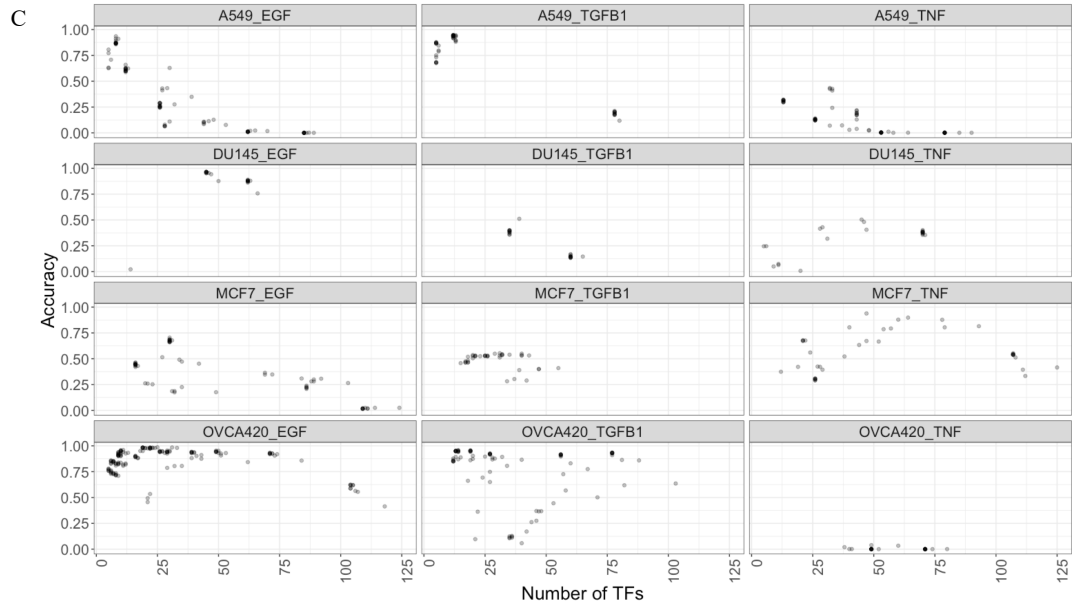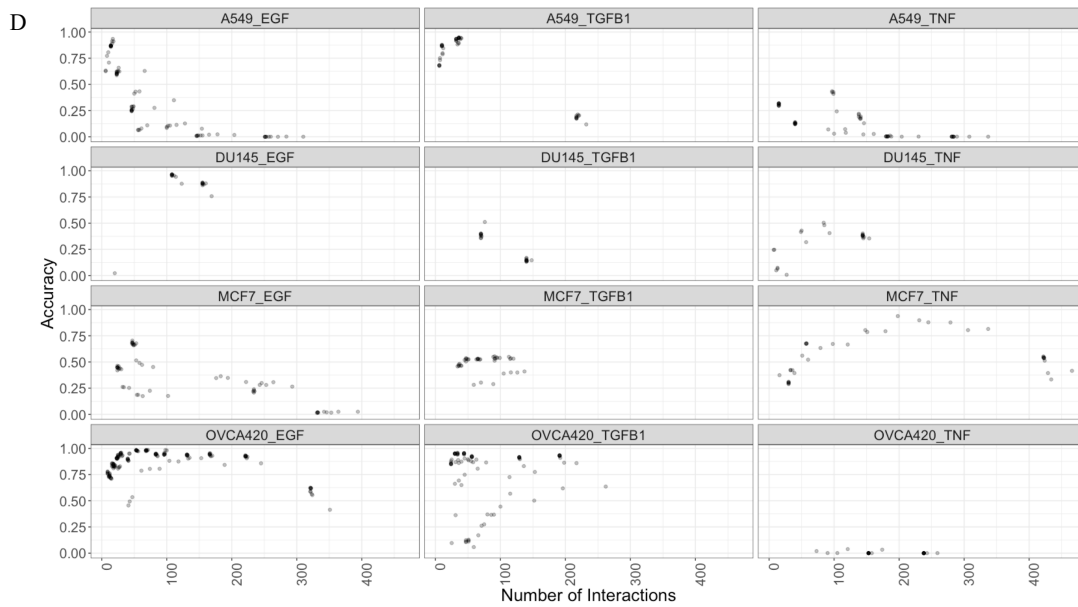



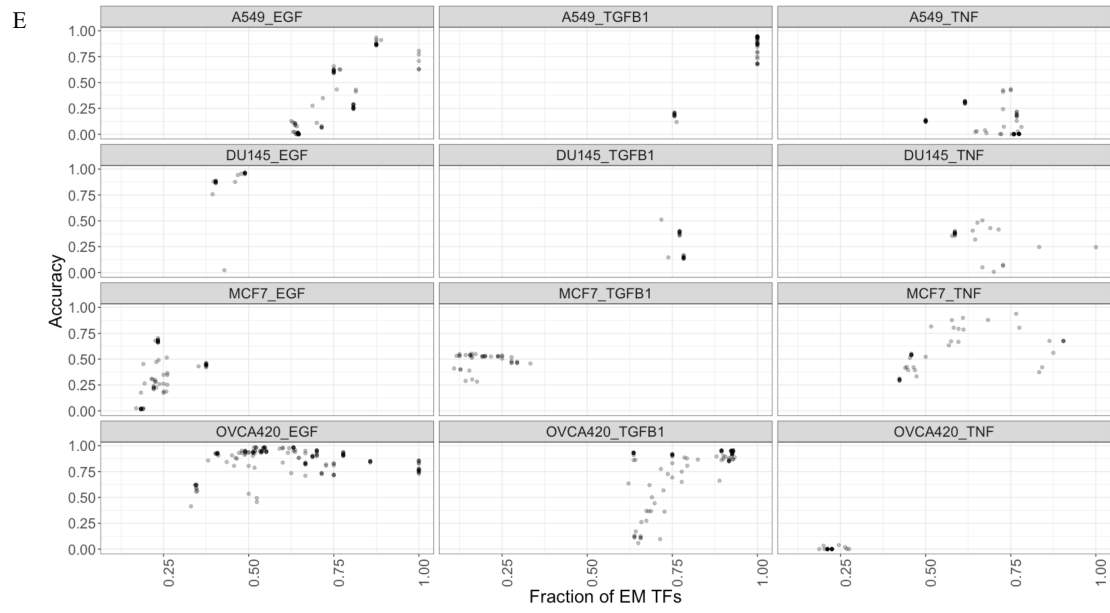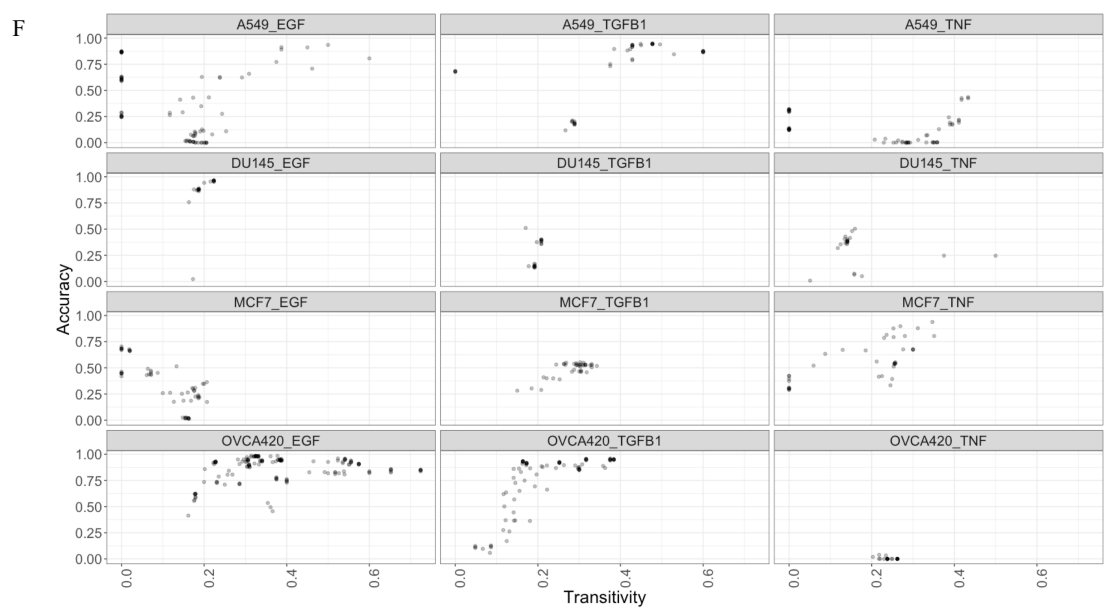

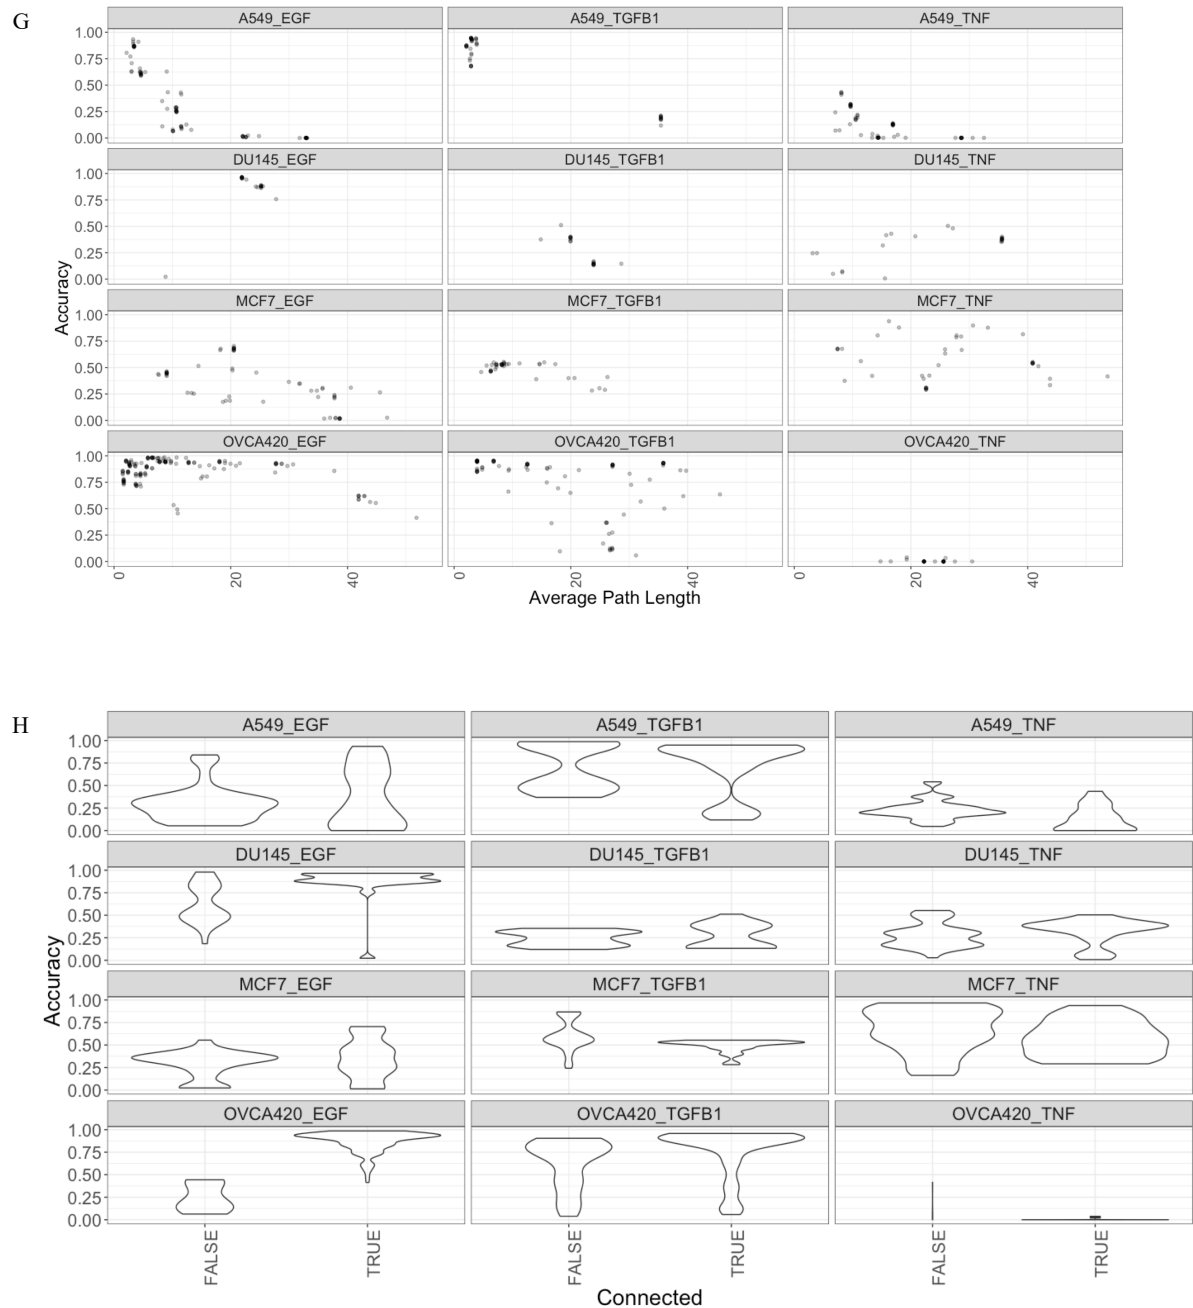

**Figure S5.** Accuracy dependence on various network properties for each condition. **(A-B)** Box plots showing accuracy of networks for various **(A)** mutual information cutoffs for inhibitory interactions, **(B)** mutual information cutoffs for excitatory interactions. Points showing accuracy (measured as fraction of models that can be classified as E or M) of networks for various **(C)** number of TFs in the network, **(D)** number of interactions in the network, **(E)** TFs assigned as E

or M using experimental data, **(F)** transitivity or clustering coefficient of networks, **(G)** average path length of the networks. **(H)** Violin plots of accuracy values for connected and unconnected networks. Note that only connected networks were used for all analysis in the manuscript.

## A Average activity over time for OVCA420 TGFB1

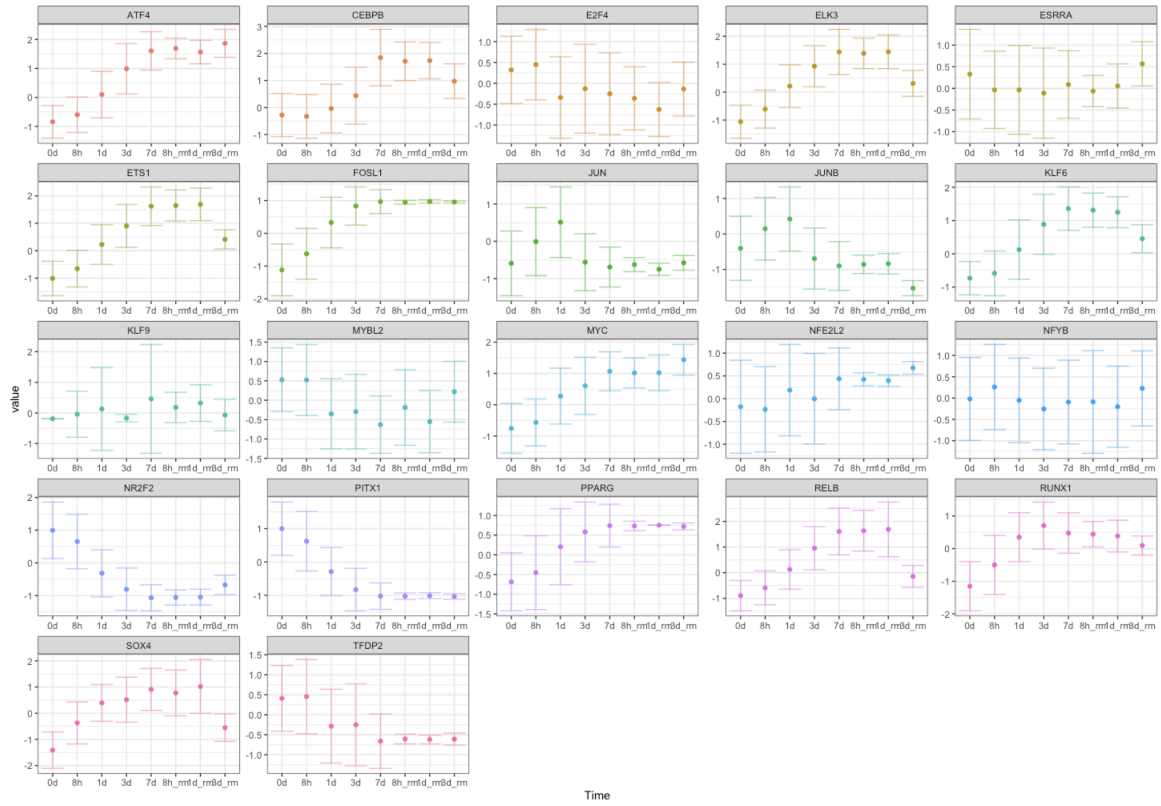

## B Average activity over time for OVCA420 TGFB1 network in simulations during signal induction and removal.

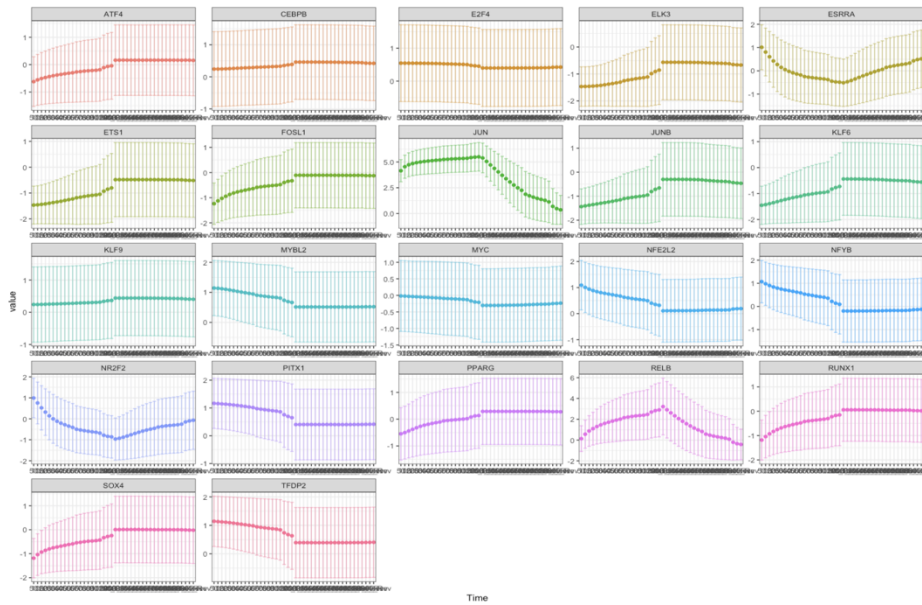

C Average activity over time for OVCA420 TGFB1 network in simulations during signal induction and inhibition.

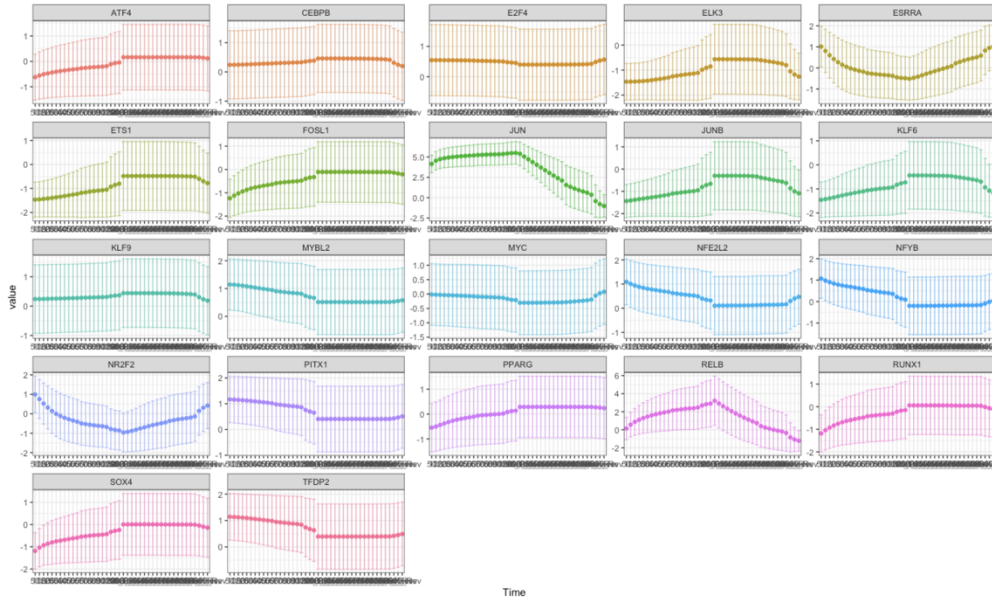

**Figure S6.** The mean and standard deviation of various TFs in the OVCA420 TGFB1 network at multiple time points in experiments (A) and simulations (B-C). The signal was applied till mid point and then removed (B) or inhibited (C). The expressions appear to increase/decrease suddenly at the mid-point as it corresponds to a large jump in time from  $T=50$  to  $T=2000$ . Signal was removed or inhibited after  $T = 2000$ .

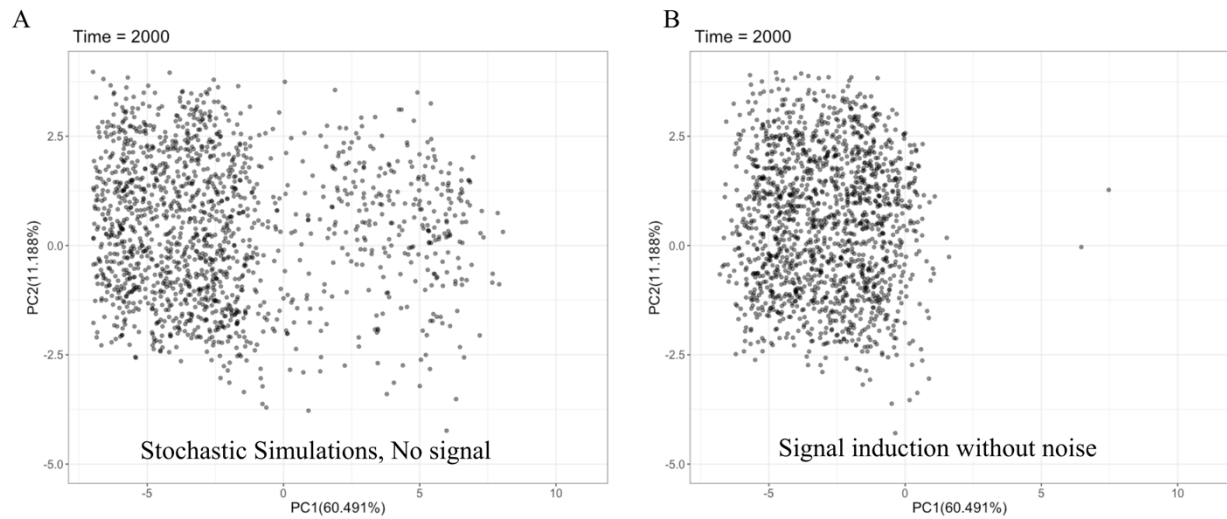

**Figure S7.** The simulated profiles at T=2000 using only noise (**A**) or only induction (**B**) in E-state models. The simulations indicate that either the noise (0.05 here) or signal induction only is not sufficient to drive state transitions for a substantial number of models. However, much more state transitions can be achieved by adding both noise and signal induction (Figure 7E in main text).

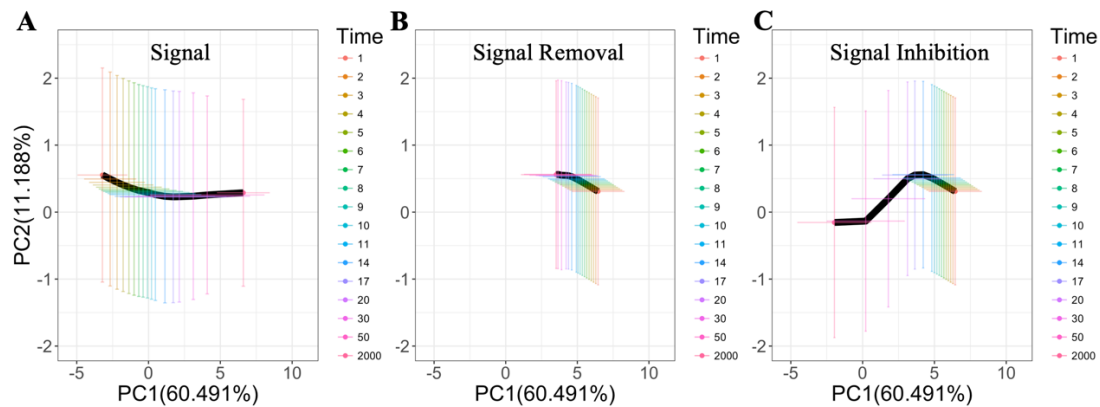

**Figure S8.** Mean and standard deviation of the simulated profiles of the E-state models that transited to M state during **(A)** signal induction (left), **(B)** removal (middle), and **(C)** inhibition (right) at multiple time points projected on the first two principal components of the simulated data of all models. These models were selected from all of the E models whose PC1 component was larger than 2.5 at the end of signal induction simulations. There are ~42% of E models belonging to this type.

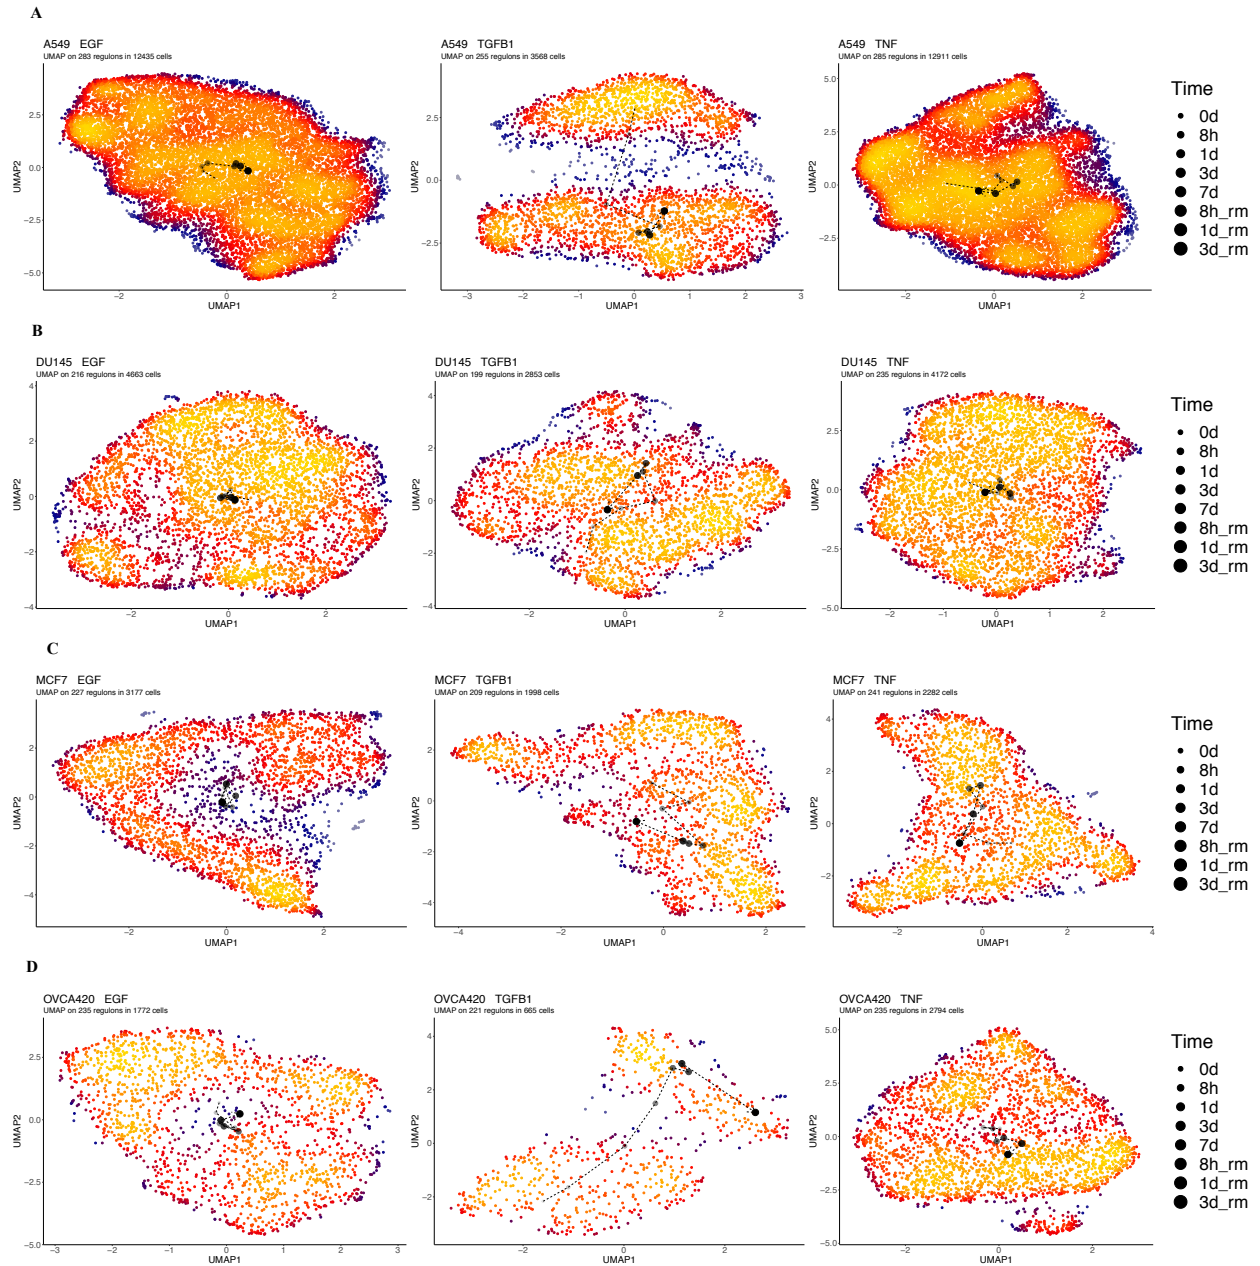

**Figure S9.** UMAP projections of regulon activity in (A) A549, (B) DU145, (C) MCF7, and (D) OVCA420 cells. Overlaid black points show centroids for each timepoint. Timepoint is also indicated by point size and transparency, and centroids for each timepoint are connected with a dashed line.



**Table S1.** Shared TFs in the core GRC, their phenotypic state assignments, and references.

| Gene    | State | Evidence (SI Reference Number) |
|---------|-------|--------------------------------|
| BHLHE40 | M?    | 1,31,40                        |
| CEBPB   | M     | 2,19                           |
| CREB3   | M     | 39                             |
| CREM    |       | 7,16                           |
| ELK3    | M     | 5                              |
| ESRRA   |       | 37                             |
| ETS1    | M     | 17                             |
| ETS2    | M     | 3                              |
| FOS     | E     | 22                             |
| FOSB    | M     | 23,24                          |
| FOSL1   | M     | 15                             |
| IRF1    | M?    | 13,43,44                       |
| IRF2    |       |                                |
| IRF3    | E     | 42                             |
| IRF7    | M     | 43                             |
| JUN     |       | 32                             |
| JUNB    |       | 32                             |
| KLF6    | M     | 10                             |
| MAFG    | E?    | 12                             |
| MYC     | M     | 6                              |
| NFE2L3  | M     | 45                             |
| NFKB    | M     | 11,18,27                       |
| RELB    | M     | 20                             |
| SOX4    | M     | 38                             |
| SPDEF   | E     | 35                             |
| STAT1   |       |                                |
| STAT3   | M     | 21                             |
| XBP1    | M     | 34                             |

**Table S2.** Literature-based core network interactions and supporting evidence.

| Source | Target | Interaction Type* | Description                                              | SI Reference Number |
|--------|--------|-------------------|----------------------------------------------------------|---------------------|
| Sig    | NFKB   | 1                 | TGFB/TNF/EGR activates NFKB                              | 30, 36, 41          |
| Sig    | AP1    | 1                 | TGFB/TNF/EGR activates JUN/FOS                           | 4,30,41             |
| NFKB   | AP1    | 1                 | NFKB activates FOS                                       | 8                   |
| AP1    | AP1    | 2                 | JunB inhibits FOS                                        | 32                  |
| NFKB   | NFKB   | 2                 | NFKB IKB form negative feedback loop                     | 14,28               |
| NFKB   | SNAIL  | 1                 | NKFB signaling stablize SNAIL                            | 41                  |
| SNAIL  | SNAIL  | 2                 | SNAIL binds its own promoter and controls its expression | 26                  |
| AP1    | SNAIL  | 1                 | AP1 induces SNAIL expression                             | 20                  |
| SNAIL  | ZEB    | 1                 | SNAIL indirectly activates ZEB                           | 25                  |
| ZEB    | ZEB    | 1                 | ZEB indirectly activates ZEB expression                  | 9,29                |
| SNAIL  | CDH1   | 2                 | SNAIL suppresses CDH1                                    | 33                  |
| ZEB    | CDH1   | 2                 | SNAIL suppresses CDH1                                    | 33                  |

\*Interaction type 1 denotes activation and type 2 denotes inhibition.

**Table S3.** Properties of the networks shown in Fig. 6.

| CellLine             | A549    |         |         | DU145    |          |          | MCF7     |          |          | OVCA420  |          |          |
|----------------------|---------|---------|---------|----------|----------|----------|----------|----------|----------|----------|----------|----------|
| Signal               | EGF     | TGFB1   | TNF     | EGF      | TGFB1    | TNF      | EGF      | TGFB1    | TNF      | EGF      | TGFB1    | TNF      |
| MiPositive           | 0.3     | 0.4     | 0.2     | 0.1      | 0.1      | 0.1      | 0.65     | 0.2      | 0.15     | 0.25     | 0.4      | 0.15     |
| MiNegative           | 0.05    | 0.1     | 0.2     | 0.15     | 0.05     | 0.1      | 0.05     | 0.25     | 0.1      | 0.15     | 0.1      | 0.05     |
| Accuracy             | 0.6285  | 0.9395  | 0.4095  | 0.955    | 0.5115   | 0.481    | 0.6625   | 0.529    | 0.8785   | 0.9845   | 0.877    | 0.0385   |
| Nodes                | 30      | 13      | 33      | 46       | 39       | 46       | 30       | 40       | 60       | 31       | 29       | 49       |
| Interactions         | 66      | 40      | 99      | 111      | 76       | 85       | 49       | 115      | 245      | 98       | 55       | 121      |
| PositiveInteractions | 18      | 36      | 96      | 109      | 70       | 83       | 2        | 111      | 233      | 96       | 34       | 101      |
| EModels              | 977     | 1645    | 817     | 1769     | 983      | 948      | 800      | 1037     | 1730     | 1808     | 1407     | 8        |
| MModels              | 280     | 234     | 2       | 141      | 40       | 14       | 525      | 21       | 27       | 161      | 347      | 69       |
| Mgenes               | 12      | 12      | 22      | 22       | 24       | 29       | 2        | 5        | 35       | 16       | 16       | 4        |
| Egenes               | 11      | 1       | 2       | 0        | 4        | 1        | 5        | 0        | 6        | 1        | 7        | 8        |
| Transitivity         | 0.19466 | 0.49565 | 0.41758 | 0.21552  | 0.17045  | 0.15254  | 0.02013  | 0.26678  | 0.31181  | 0.37755  | 0.21145  | 0.21809  |
| MeanDistance         | 9.03103 | 3.75000 | 8.08617 | 22.00000 | 18.31242 | 27.17343 | 20.52069 | 14.63397 | 17.95000 | 10.72258 | 15.96675 | 19.27806 |

## SI References

1. H-J Cho; N Oh; J-H Park; K-S Kim; H-K Kim; E Lee; S Hwang; S-J Kim; K-S Park. ZEB1 Collaborates with ELK3 to Repress E-Cadherin Expression in Triple-Negative Breast Cancer Cells. *Mol Cancer Res* 17, 2257–2266 (2019)
2. L Hill; G Browne; E Tulchinsky. ZEB/miR-200 feedback loop: At the crossroads of signal transduction in cancer. *Int J Cancer* 132, 745–754 (2013)
3. Y Li; Y Liu; Y Xu; JJ Voorhees; GJ Fisher. UV irradiation induces Snail expression by AP-1 dependent mechanism in human skin keratinocytes. *Journal of Dermatological Science* 60, 105–113 (2010)
4. W Shi; Z Chen; L Li; H Liu; R Zhang; Q Cheng; D Xu; L Wu. Unravel the molecular mechanism of XBP1 in regulating the biology of cancer cells. *J Cancer* 10, 2035–2046 (2019)
5. C Li; Z Wang; Y Chen; M Zhou; H Zhang; R Chen; F Shi; C Wang; Z Rui. Transcriptional silencing of ETS-1 abrogates epithelial-mesenchymal transition resulting in reduced motility of pancreatic cancer cells. *Oncology Reports* 33, 559–565 (2015)
6. Y Wu; BP Zhou. TNF- $\alpha$ /NF- $\kappa$ B/Snail pathway in cancer cell migration and invasion. *Br J Cancer* 102, 639–644 (2010)
7. JJ Steffan; S Koul; RB Meacham; HK Koul. The Transcription Factor SPDEF Suppresses Prostate Tumor Metastasis. *J Biol Chem* 287, 29968–29978 (2012)
8. Y Wu; F Sato; T Yamada; UK Bhawal; T Kawamoto; K Fujimoto; M Noshiro; H Seino; S Morohashi; K Hakamada; Y Abiko; Y Kato; H Kijima. The BHLH transcription factor DEC1 plays an important role in the epithelial-mesenchymal transition of pancreatic cancer. *International Journal of Oncology* 41, 1337–1346 (2012)

9. SB Pakala; K Singh; SDN Reddy; K Ohshiro; D-Q Li; L Mishra; R Kumar. TGF- $\beta$ 1 signaling targets metastasis-associated protein 1, a new effector in epithelial cells. *Oncogene* 30, 2230–2241 (2011)
10. H Chang; Y Liu; M Xue; H Liu; S Du; L Zhang; P Wang. Synergistic action of master transcription factors controls epithelial-to-mesenchymal transition. *Nucleic Acids Res* 44, 2514–2527 (2016)
11. N Tiwari; VK Tiwari; L Waldmeier; PJ Balwierz; P Arnold; M Pachkov; N Meyer-Schaller; D Schübeler; E van Nimwegen; G Christofori. Sox4 Is a Master Regulator of Epithelial-Mesenchymal Transition by Controlling Ezh2 Expression and Epigenetic Reprogramming. *Cancer Cell* 23, 768–783 (2013)
12. S Peiro. Snail1 transcriptional repressor binds to its own promoter and controls its expression. *Nucleic Acids Research* 34, 2077–2084 (2006)
13. H Peinado; D Olmeda; A Cano. Snail, Zeb and bHLH factors in tumour progression: an alliance against the epithelial phenotype? *Nat Rev Cancer* 7, 415–428 (2007)
14. J Wouters; Z Kalender-Atak; L Minnoye; KI Spanier; M De Waegeneer; CB González-Blas; D Mauduit; K Davie; G Hulselmans; A Najem; M Dewaele; F Rambow; S Makhzami; V Christiaens; F Ceysens; G Ghanem; J-C Marine; S Poovathingal; S Aerts. Single-cell gene regulatory network analysis reveals new melanoma cell states and transition trajectories during phenotype switching. *Genomics* (2019)
15. M-M Yu; Y-H Feng; L Zheng; J Zhang; G-H Luo. Short hairpin RNA-mediated knockdown of nuclear factor erythroid 2-like 3 exhibits tumor-suppressing effects in hepatocellular carcinoma cells. *WJG* 25, 1210–1223 (2019)

16. J Holian; W Qi; DJ Kelly; Y Zhang; E Mreich; CA Pollock; X-M Chen. Role of Krüppel-like factor 6 in transforming growth factor- $\beta$ 1-induced epithelial-mesenchymal transition of proximal tubule cells. *American Journal of Physiology-Renal Physiology* 295, F1388–F1396 (2008)
17. K Asanoma; G Liu; T Yamane; Y Miyanari; T Takao; H Yagi; T Ohgami; A Ichinoe; K Sonoda; N Wake; K Kato. Regulation of the Mechanism of *TWIST1* Transcription by BHLHE40 and BHLHE41 in Cancer Cells. *Mol Cell Biol* 35, 4096–4109 (2015)
18. SJ Serrano-Gomez; M Maziveyi; SK Alahari. Regulation of epithelial-mesenchymal transition through epigenetic and post-translational modifications. *Mol Cancer* 15, 18 (2016)
19. KB Cho; MK Cho; WY Lee; KW Kang. Overexpression of c-myc induces epithelial mesenchymal transition in mammary epithelial cells. *Cancer Letters* 293, 230–239 (2010)
20. DA Potoyan; PG Wolynes. On the dephasing of genetic oscillators. *Proc Natl Acad Sci USA* 111, 2391–2396 (2014)
21. A Jana; NL Krett; G Guzman; A Khalid; O Ozden; JJ Staudacher; J Bauer; SH Baik; T Carroll; C Yazici; B Jung. NF $\kappa$ B is essential for activin-induced colorectal cancer migration via upregulation of PI3K-MDM2 pathway. *Oncotarget* 8 (2017)
22. BRB Pires; AL Mencialha; GM Ferreira; WF de Souza; JA Morgado-Díaz; AM Maia; S Corrêa; ESW Abdelhay. NF-kappaB Is Involved in the Regulation of EMT Genes in Breast Cancer Cells. *PLoS ONE* 12, e0169622 (2017)
23. S Fujioka; J Niu; C Schmidt; GM Sclabas; B Peng; T Uwagawa; Z Li; DB Evans; JL Abbruzzese; PJ Chiao. NF- $\kappa$ B and AP-1 Connection: Mechanism of NF- $\kappa$ B-Dependent Regulation of AP-1 Activity. *Molecular and Cellular Biology* 24, 7806–7819 (2004)
24. L Jiang; J Liu; Y Shi; B Tang; T He; J Liu; J Fan; B Wu; X Xu; Y Zhao; F Qian; Y Cui; P Yu. MTMR2 promotes invasion and metastasis of gastric cancer via inactivating IFN $\gamma$ /STAT1 signaling. *J Exp Clin Cancer Res* 38, 206 (2019)

25. M Yu; H Xue; Y Wang; Q Shen; Q Jiang; X Zhang; K Li; M Jia; J Jia; J Xu; Y Tian. miR-345 inhibits tumor metastasis and EMT by targeting IRF1-mediated mTOR/STAT3/AKT pathway in hepatocellular carcinoma. *International Journal of Oncology* 50, 975–983 (2017)
26. YC Jia; JY Wang; YY Liu; B Li; H Guo; AM Zang. LncRNA MAFG-AS1 facilitates the migration and invasion of NSCLC cell via sponging miR-339-5p from MMP15. *Cell Biol Int* 43, 384–393 (2019)
27. J Schütte; J Viallet; M Nau; S Segal; J Fedorko; J Minna. jun-B inhibits and c-fos stimulates the transforming and trans-activating activities of c-jun. *Cell* 59, 987–997 (1989)
28. JD Kearns; S Basak; SL Werner; CS Huang; A Hoffmann. I $\kappa$ B $\epsilon$  provides negative feedback to control NF- $\kappa$ B oscillations, signaling dynamics, and inflammatory gene expression. *The Journal of Cell Biology* 173, 659–664 (2006)
29. P Xu; S Bailey-Bucktrout; Y Xi; D Xu; D Du; Q Zhang; W Xiang; J Liu; A Melton; D Sheppard; HA Chapman; JA Bluestone; R Derynck. Innate Antiviral Host Defense Attenuates TGF- $\beta$  Function through IRF3-Mediated Suppression of Smad Signaling. *Molecular Cell* 56, 723–737 (2014)
30. AK Kiemer; K Takeuchi; MP Quinlan. Identification of genes involved in epithelial-mesenchymal transition and tumor progression. *Oncogene* 20, 6679–6688 (2001)
31. C Tiraby; BC Hazen; ML Gantner; A Kralli. Estrogen-Related Receptor Gamma Promotes Mesenchymal-to-Epithelial Transition and Suppresses Breast Tumor Growth. *Cancer Research* 71, 2518–2528 (2011)
32. M Romagnoli; K Belguise; Z Yu; X Wang; E Landesman-Bollag; DC Seldin; D Chabos; S Barillé-Nion; P Jézéquel; ML Seldin; GE Sonenshein. Epithelial-to-Mesenchymal Transition Induced by TGF- $\beta$ 1 Is Mediated by Blimp-1–Dependent Repression of BMP-5. *Cancer Res* 72, 6268–6278 (2012)

33. C-W Li; W Xia; L Huo; S-O Lim; Y Wu; JL Hsu; C-H Chao; H Yamaguchi; N-K Yang; Q Ding; Y Wang; Y-J Lai; AM LaBaff; T-J Wu; B-R Lin; M-H Yang; GN Hortobagyi; M-C Hung. Epithelial-Mesenchymal Transition Induced by TNF- Requires NF- B-Mediated Transcriptional Upregulation of Twist1. *Cancer Research* 72, 1290–1300 (2012)
34. J Yang; B Tian; H Sun; RP Garofalo; AR Brasier. Epigenetic silencing of IRF1 dysregulates type III interferon responses to respiratory virus infection in epithelial to mesenchymal transition. *Nat Microbiol* 2, 17086 (2017)
35. H-W Lo; S-C Hsu; W Xia; X Cao; J-Y Shih; Y Wei; JL Abbruzzese; GN Hortobagyi; M-C Hung. Epidermal Growth Factor Receptor Cooperates with Signal Transducer and Activator of Transcription 3 to Induce Epithelial-Mesenchymal Transition in Cancer Cells via Up-regulation of *TWIST* Gene Expression. *Cancer Res* 67, 9066–9076 (2007)
36. D Chen; JS Davis. Epidermal growth factor induces c-fos and c-jun mRNA via Raf-1/MEK1/ERK-dependent and -independent pathways in bovine luteal cells. *Molecular and Cellular Endocrinology* 200, 141–154 (2003)
37. L Sun; G Carpenter. Epidermal growth factor activation of NF- $\kappa$ B is mediated through I $\kappa$ B $\alpha$  degradation and intracellular free calcium. *Oncogene* 16, 2095–2102 (1998)
38. J Li; F Shan; G Xiong; X Chen; X Guan; J-M Wang; W-L Wang; X Xu; Y Bai. EGF-induced C/EBP participates in EMT by decreasing the expression of miR-203 in esophageal squamous cell carcinoma cells. *Journal of Cell Science* 127, 3735–3744 (2014)
39. F Sato; UK Bhawal; T Yoshimura; Y Muragaki. DEC1 and DEC2 Crosstalk between Circadian Rhythm and Tumor Progression. *J Cancer* 7, 153–159 (2016)
40. S Mahner; C Baasch; J Schwarz; S Hein; L Wölber; F Jänicke; K Milde-Langosch. C-Fos expression is a molecular predictor of progression and survival in epithelial ovarian carcinoma. *Br J Cancer* 99, 1269–1275 (2008)



41. R Kessler; A Zacharova-Albinger; NB Laursen; M Kalousek; R Klemenz. Attenuated expression of the serum responsive T1 gene in ras transformed fibroblasts due to the inhibition of c-fos gene activity. *Oncogene* 18, 1733–1744 (1999)
42. B-T Preca; K Bajdak; K Mock; W Lehmann; V Sundararajan; P Bronsert; A Matzge-Ogi; V Orian-Rousseau; S Brabletz; T Brabletz; J Maurer; MP Stemmler. A novel ZEB1/HAS2 positive feedback loop promotes EMT in breast cancer. *Oncotarget* 8 (2017)
43. C Bornstein; D Winter; Z Barnett-Itzhaki; E David; S Kadri; M Garber; I Amit. A Negative Feedback Loop of Transcription Factors Specifies Alternative Dendritic Cell Chromatin States. *Molecular Cell* 56, 749–762 (2014)
44. Y Nakabeppu; D Nathans. A naturally occurring truncated form of FosB that inhibits Fos/Jun transcriptional activity. *Cell* 64, 751–759 (1991)
45. GM Fimia; D De Cesare; P Sassone-Corsi. A Family of LIM-Only Transcriptional Coactivators: Tissue-Specific Expression and Selective Activation of CREB and CREM. *Molecular and Cellular Biology* 20, 8613–8622 (2000)
