# Supplementary material for: Toward Modeling Context-Specific EMT Regulatory Networks Using Temporal Single Cell RNA-Seq Data
Source: Front Mol Biosci. 2020 Apr 23;7:54. doi: 10.3389/fmolb.2020.00054 (PMC7190801; doi:10.3389/fmolb.2020.00054)
Supplement: Supplementary file 2 [file Data_Sheet_1.ZIP]

Archive with 27 entries (24 files):
- SI_Networks/
- SI_Networks/A549_EGF_0.3_0.05Interactions.txt
- __MACOSX/
- __MACOSX/SI_Networks/
- __MACOSX/SI_Networks/._A549_EGF_0.3_0.05Interactions.txt
- SI_Networks/A549_TGFB1_0.4_0.1Interactions.txt
- __MACOSX/SI_Networks/._A549_TGFB1_0.4_0.1Interactions.txt
- SI_Networks/A549_TNF_0.2_0.2Interactions.txt
- __MACOSX/SI_Networks/._A549_TNF_0.2_0.2Interactions.txt
- SI_Networks/DU145_EGF_0.1_0.15Interactions.txt
- __MACOSX/SI_Networks/._DU145_EGF_0.1_0.15Interactions.txt
- SI_Networks/DU145_TGFB1_0.1_0.05Interactions.txt
- __MACOSX/SI_Networks/._DU145_TGFB1_0.1_0.05Interactions.txt
- SI_Networks/DU145_TNF_0.1_0.1Interactions.txt
- __MACOSX/SI_Networks/._DU145_TNF_0.1_0.1Interactions.txt
- SI_Networks/MCF7_EGF_0.65_0.05Interactions.txt
- __MACOSX/SI_Networks/._MCF7_EGF_0.65_0.05Interactions.txt
- SI_Networks/MCF7_TGFB1_0.2_0.25Interactions.txt
- __MACOSX/SI_Networks/._MCF7_TGFB1_0.2_0.25Interactions.txt
- SI_Networks/MCF7_TNF_0.15_0.1Interactions.txt
- __MACOSX/SI_Networks/._MCF7_TNF_0.15_0.1Interactions.txt
- SI_Networks/OVCA420_EGF_0.25_0.15Interactions.txt
- __MACOSX/SI_Networks/._OVCA420_EGF_0.25_0.15Interactions.txt
- SI_Networks/OVCA420_TGFB1_0.4_0.1Interactions.txt
- __MACOSX/SI_Networks/._OVCA420_TGFB1_0.4_0.1Interactions.txt
- SI_Networks/OVCA420_TNF_0.15_0.05Interactions.txt
- __MACOSX/SI_Networks/._OVCA420_TNF_0.15_0.05Interactions.txt
