# Supplementary material for: Toward Modeling Context-Specific EMT Regulatory Networks Using Temporal Single Cell RNA-Seq Data
Source: Front Mol Biosci. 2020 Apr 23;7:54. doi: 10.3389/fmolb.2020.00054 (PMC7190801; doi:10.3389/fmolb.2020.00054)
Supplement: Supplementary file 2 [file Data_Sheet_1.ZIP › SI_Networks/A549_EGF_0.3_0.05Interactions.txt]

Source Target Type
MYC ATF1 1
JUNB FOS 1
MYC FOS 2
NFYB FOS 2
ELF3 FOS 1
MLX FOS 2
THAP11 FOS 2
CEBPG FOS 2
ATF5 FOS 2
TFDP1 FOS 2
MNT FOS 2
FOS JUNB 1
MYC JUNB 2
NFYB JUNB 2
THAP11 JUNB 2
NFYC JUNB 2
CTCF JUNB 2
NFE2L2 JUNB 2
SP2 JUNB 2
ATF1 MYC 1
FOS MYC 2
JUNB MYC 2
NFYB MYC 1
FOSL1 MYC 1
FOSB MYC 2
FOS NFKB2 2
RELB NFKB2 1
ELF3 NFKB2 2
FOS RELB 2
NFKB2 RELB 1
FOSL1 RELB 1
FOS NFYB 2
JUNB NFYB 2
NFKB2 ELF3 2
RELB ELF3 2
STAT3 ELF3 2
MYC FOSL1 1
RELB FOSL1 1
EGR1 FOSL1 2
FOSB FOSL1 2
MYC BHLHE40 2
EGR1 BHLHE40 1
FOSL1 EGR1 2
BHLHE40 EGR1 1
BHLHE40 MLX 2
FOS THAP11 2
FOS NFYC 2
MYC NFYC 1
FOS CEBPG 2
JUNB CEBPG 2
FOS ATF5 2
JUNB CTCF 2
MYC NFE2L2 1
MYC FOSB 2
FOSL1 FOSB 2
JUNB TFDP1 2
FOS MNT 2
RELB STAT3 1
JUNB SP2 2
MYC YBX1 1
MYC ZNF580 2
ELF3 ESRRA 2
FOS NR2C2 2
FOSL1 SPDEF 2
MYC NFATC2 2
JUNB CREM 2
