# Supplementary material for: Toward Modeling Context-Specific EMT Regulatory Networks Using Temporal Single Cell RNA-Seq Data
Source: Front Mol Biosci. 2020 Apr 23;7:54. doi: 10.3389/fmolb.2020.00054 (PMC7190801; doi:10.3389/fmolb.2020.00054)
Supplement: Supplementary file 2 [file Data_Sheet_1.ZIP › SI_Networks/A549_TGFB1_0.4_0.1Interactions.txt]

Source Target Type
JUNB JUN 1
ETS2 JUN 1
KLF6 JUN 1
CREM JUN 1
JUN JUNB 1
ETS2 JUNB 1
KLF6 JUNB 1
ELK3 JUNB 1
TBPL1 JUNB 1
JUN ETS2 1
JUNB ETS2 1
JUN KLF6 1
JUNB KLF6 1
BHLHE40 KLF6 1
FOSB KLF6 1
TBPL1 KLF6 1
KLF6 BHLHE40 1
FOSB BHLHE40 1
KLF6 FOSB 1
BHLHE40 FOSB 1
JUN ELK3 1
JUNB ELK3 1
KLF6 ELK3 1
SOX4 ELK3 1
JUNB SOX4 1
KLF6 SOX4 1
ELK3 SOX4 1
CREM SOX4 1
KLF6 TBPL1 1
JUN CREM 1
ELK3 CREM 1
HMGA2 CREM 1
CREM HMGA2 1
JUN FOXP1 1
SOX4 FOXP1 1
CREM FOXP1 1
JUN SMAD3 2
ELK3 SMAD3 2
SOX4 SMAD3 2
CREM SMAD3 2
