# Supplementary material for: Toward Modeling Context-Specific EMT Regulatory Networks Using Temporal Single Cell RNA-Seq Data
Source: Front Mol Biosci. 2020 Apr 23;7:54. doi: 10.3389/fmolb.2020.00054 (PMC7190801; doi:10.3389/fmolb.2020.00054)
Supplement: Supplementary file 2 [file Data_Sheet_1.ZIP › SI_Networks/A549_TNF_0.2_0.2Interactions.txt]

Source Target Type
NFKB1 RELB 1
NFKB2 RELB 1
IRF1 RELB 1
ETS1 RELB 1
FOSL1 RELB 1
STAT3 RELB 1
RELB NFKB1 1
JUNB KLF7 1
RELB NFKB2 1
NFKB1 NFKB2 1
IRF1 NFKB2 1
IRF9 NFKB2 1
FOSB FOS 1
JUNB FOS 1
MYC FOS 2
EGR1 FOS 1
ATF3 FOS 1
BHLHE40 FOS 1
FOS FOSB 1
JUN FOSB 1
JUNB FOSB 1
EGR1 FOSB 1
ATF3 FOSB 1
BHLHE40 FOSB 1
KLF6 FOSB 1
KLF7 JUN 1
FOSB JUN 1
JUNB JUN 1
FOSL2 JUN 1
ATF3 JUN 1
KLF6 JUN 1
KLF7 JUNB 1
FOS JUNB 1
FOSB JUNB 1
JUN JUNB 1
EGR1 JUNB 1
ATF3 JUNB 1
BHLHE40 JUNB 1
KLF6 JUNB 1
ETS2 JUNB 1
ELK3 JUNB 1
CREB3L2 JUNB 1
FOS MYC 2
NFYC MYC 1
MAX MYC 1
FOSL1 MYC 1
CTCF MYC 1
RELB IRF1 1
NFKB2 IRF1 1
IRF7 IRF1 1
STAT1 IRF1 1
FOS EGR1 1
FOSB EGR1 1
JUNB EGR1 1
BHLHE40 EGR1 1
MYC NFYC 1
IRF1 IRF7 1
KLF6 FOSL2 1
FOS ATF3 1
FOSB ATF3 1
JUN ATF3 1
JUNB ATF3 1
BHLHE40 ATF3 1
KLF6 ATF3 1
FOS BHLHE40 1
FOSB BHLHE40 1
JUNB BHLHE40 1
EGR1 BHLHE40 1
ATF3 BHLHE40 1
KLF6 BHLHE40 1
KLF7 KLF6 1
FOSB KLF6 1
JUN KLF6 1
JUNB KLF6 1
FOSL2 KLF6 1
ATF3 KLF6 1
BHLHE40 KLF6 1
ELK3 KLF6 1
MYC MAX 1
IRF7 IRF9 1
RELB ETS1 1
JUN ETS2 1
JUNB ETS2 1
RELB FOSL1 1
MYC FOSL1 1
THAP11 FOSL1 1
RELB STAT3 1
IRF1 STAT1 1
JUN ELK3 1
JUNB ELK3 1
KLF6 ELK3 1
FOS THAP11 2
MYC CTCF 1
JUNB CREB3L2 1
MYC ATF1 1
MYC YBX1 1
JUNB SOX4 1
MYC E2F6 1
FOSL1 ESRRA 1
