# Supplementary material for: Toward Modeling Context-Specific EMT Regulatory Networks Using Temporal Single Cell RNA-Seq Data
Source: Front Mol Biosci. 2020 Apr 23;7:54. doi: 10.3389/fmolb.2020.00054 (PMC7190801; doi:10.3389/fmolb.2020.00054)
Supplement: Supplementary file 2 [file Data_Sheet_1.ZIP › SI_Networks/DU145_EGF_0.1_0.15Interactions.txt]

Source Target Type
KLF6 FOSL1 1
RELB FOSL1 1
ETS2 FOSL1 1
ETV5 FOSL1 1
JUN FOSL1 1
ELK3 FOSL1 1
CREB3 FOSL1 1
ESRRA FOSL1 1
BATF3 FOSL1 1
MAX FOSL1 1
FOSL1 KLF6 1
ETS2 KLF6 1
HOXB8 KLF6 1
JUN KLF6 1
ZNF706 KLF6 1
CREB3 KLF6 1
ARNTL2 KLF6 1
ATF1 KLF6 2
HOXB5 KLF6 1
HOXB7 KLF6 1
MXD4 KLF6 1
ATF3 MYC 1
DDIT3 MYC 1
FOSL1 RELB 1
KLF6 RELB 1
CREB3 RELB 1
ESRRA RELB 1
BATF3 RELB 1
FOSL1 ETS2 1
KLF6 ETS2 1
JUN ETS2 1
FOSL1 HOXB8 1
CREB3 HOXB8 1
CEBPG CEBPB 1
ATF4 CEBPB 1
DDIT3 CEBPB 1
CEBPB CEBPG 1
FOSL1 ETV5 1
KLF6 ETV5 1
FOSL1 JUN 1
KLF6 JUN 1
ELK3 JUN 1
JUNB JUN 1
ARNTL2 JUN 1
BACH1 JUN 1
FOSL1 ZNF706 1
KLF6 ZNF706 1
JUN ZNF706 1
SOX4 ZNF706 1
MYC ATF3 1
CEBPB ATF4 1
FOSL1 ELK3 1
KLF6 ELK3 1
RELB ELK3 1
ETS2 ELK3 1
FOSL1 CREB3 1
KLF6 CREB3 1
RELB CREB3 1
ARNTL2 CREB3 1
FOSL1 ESRRA 1
KLF6 ESRRA 1
ELK3 ESRRA 1
TFDP1 ESRRA 1
CEBPB DDIT3 1
XBP1 DDIT3 1
MYC GTF2B 1
JUNB GTF2B 1
JUNB IRF1 1
JUN JUNB 1
GTF2B JUNB 1
IRF1 JUNB 1
ATF1 JUNB 1
DDIT3 XBP1 1
FOSL1 ARNTL2 1
KLF6 ARNTL2 1
JUN ARNTL2 1
KLF6 ATF1 2
FOSL1 HOXB5 1
KLF6 HOXB5 1
FOSL1 TFDP1 1
KLF6 TFDP1 1
ESRRA TFDP1 1
KLF6 BACH1 1
FOSL1 BATF3 1
FOSL1 HOXB7 1
KLF6 HOXB7 1
FOSL1 MAX 1
KLF6 MXD4 1
JUN TEAD4 1
FOSL1 HOXB9 1
JUN HOXB9 1
JUN FOXA1 1
FOSL1 HOXB6 1
KLF6 HOXB6 1
FOSL1 PPARD 1
ELK3 PPARD 1
IRF1 NFE2L2 1
FOSL1 ZBTB7A 1
KLF6 ZBTB7A 1
ETS2 ZBTB7A 1
IRF1 NFKB2 1
FOSL1 RELA 1
KLF6 RELA 1
FOSL1 ZNF655 1
KLF6 ZNF655 1
FOSL1 ATF7 1
JUN HOXD8 1
KLF6 KLF7 1
JUN KLF7 1
MYC ZNF274 1
JUN TCF7L2 1
