# Supplementary material for: Toward Modeling Context-Specific EMT Regulatory Networks Using Temporal Single Cell RNA-Seq Data
Source: Front Mol Biosci. 2020 Apr 23;7:54. doi: 10.3389/fmolb.2020.00054 (PMC7190801; doi:10.3389/fmolb.2020.00054)
Supplement: Supplementary file 2 [file Data_Sheet_1.ZIP › SI_Networks/DU145_TGFB1_0.1_0.05Interactions.txt]

Source Target Type
JUNB JUN 1
CREM JUN 1
ETS2 JUN 1
BHLHE40 JUN 1
JUN JUNB 1
ETS2 JUNB 1
FOS JUNB 1
BHLHE40 JUNB 1
SPDEF CREB3 1
CREB3 SPDEF 1
SOX4 SPDEF 1
JUN CREM 1
PPARD CREM 1
SOX4 CREM 1
ELK3 CREM 1
TFDP2 CREM 1
ATF4 CEBPB 1
CEBPG CEBPB 1
DDIT3 CEBPB 1
CEBPB ATF4 1
XBP1 ATF4 1
CEBPB CEBPG 1
CEBPB DDIT3 1
XBP1 DDIT3 1
CREM PPARD 1
JUNB SOX4 1
SPDEF SOX4 1
CREM SOX4 1
ELK3 SOX4 1
KLF6 SOX4 1
BHLHE40 SOX4 1
TFDP2 SOX4 1
JUN ETS2 1
JUNB FOS 1
MXI1 MYC 1
ZNF143 MYC 1
MYC MXI1 1
SPDEF ELK3 1
CREM ELK3 1
SOX4 ELK3 1
SPDEF KLF6 1
MYC KLF6 2
ZNF706 KLF6 1
FOSL1 KLF6 1
ETS2 ZNF143 1
MYC ZNF143 1
XBP1 ZNF143 1
JUN BHLHE40 1
JUNB BHLHE40 1
CREM ZNF706 1
KLF6 ZNF706 1
TFDP1 FOSL1 1
ESRRA FOSL1 1
MAFF FOSL1 1
KLF6 TFDP1 1
FOSL1 TFDP1 1
CEBPB XBP1 1
ATF4 XBP1 1
DDIT3 XBP1 1
FOSL1 ESRRA 1
SOX4 TFDP2 1
FOSL1 MAFF 1
SOX4 RBPJ 1
SPDEF HOXB6 1
FOSL1 MYBL2 1
JUN GATA3 1
FOSL1 BATF3 1
ETS2 ZNF22 1
MYC E2F6 1
JUN KLF11 1
JUN ZNF502 1
JUN CRX 2
FOS CRX 2
KLF6 MECOM 2
MYC ZNF580 2
MYC RFX1 2
