# Supplementary material for: Toward Modeling Context-Specific EMT Regulatory Networks Using Temporal Single Cell RNA-Seq Data
Source: Front Mol Biosci. 2020 Apr 23;7:54. doi: 10.3389/fmolb.2020.00054 (PMC7190801; doi:10.3389/fmolb.2020.00054)
Supplement: Supplementary file 2 [file Data_Sheet_1.ZIP › SI_Networks/DU145_TNF_0.1_0.1Interactions.txt]

Source Target Type
KLF6 FOSL1 1
ETV5 FOSL1 1
TFDP1 FOSL1 1
ARNTL2 FOSL1 1
RELB FOSL1 1
FOSL1 KLF6 1
MYC KLF6 2
TFDP1 KLF6 1
HOXB6 KLF6 1
ARNTL2 KLF6 1
BATF3 KLF6 1
XBP1 MYC 1
JUN MYC 1
CEBPB XBP1 1
DDIT3 XBP1 1
NFYC XBP1 1
FOSL1 ETV5 1
KLF6 ETV5 1
XBP1 NFE2L2 1
CEBPB NFE2L2 1
XBP1 CEBPB 1
CEBPG CEBPB 1
ATF4 CEBPB 1
JUNB CEBPB 1
DDIT3 CEBPB 1
ATF3 CEBPB 1
CEBPB CEBPG 1
ZNF143 IRF3 1
CEBPB ATF4 1
FOSL1 TFDP1 1
KLF6 TFDP1 1
JUNB BHLHE40 1
CEBPB JUNB 1
BHLHE40 JUNB 1
IRF1 JUNB 1
NFKB2 JUNB 1
JUN JUNB 1
XBP1 DDIT3 1
CEBPB DDIT3 1
JUNB DDIT3 1
NFE2L2 IRF1 1
BHLHE40 IRF1 1
JUNB IRF1 1
NFKB2 IRF1 1
IRF1 NFKB2 1
FOSL1 HOXB6 1
KLF6 HOXB6 1
MYC NFYC 1
MYC JUN 1
XBP1 JUN 1
IRF3 JUN 1
CREB3 JUN 1
ETS2 JUN 1
ELK3 JUN 1
FOSL1 ARNTL2 1
FOSL1 RELB 1
KLF6 RELB 1
IRF3 ZNF143 1
FOSL1 BATF3 1
KLF6 BATF3 1
KLF6 PITX1 1
CEBPB ATF3 1
JUN ETS2 1
JUN ELK3 1
FOSL1 ESRRA 1
KLF6 ESRRA 1
PITX1 ESRRA 1
ZIC1 ESRRA 1
ESRRA ZIC1 1
MYC THAP1 1
FOSL1 HOXB8 1
FOSL1 HOXB5 1
MYC REST 1
MYC SP2 1
FOSL1 ZNF706 1
FOSL1 HOXB7 1
MYC EGR1 1
IRF3 STAT6 1
FOSL1 RUNX1 1
IRF1 KLF13 1
IRF1 GABPA 1
BHLHE40 KLF10 1
MYC HOXA10 1
MYC ZNF770 1
FOSL1 SREBF1 2
