# Supplementary material for: Toward Modeling Context-Specific EMT Regulatory Networks Using Temporal Single Cell RNA-Seq Data
Source: Front Mol Biosci. 2020 Apr 23;7:54. doi: 10.3389/fmolb.2020.00054 (PMC7190801; doi:10.3389/fmolb.2020.00054)
Supplement: Supplementary file 2 [file Data_Sheet_1.ZIP › SI_Networks/MCF7_EGF_0.65_0.05Interactions.txt]

Source Target Type
JUNB JUN 1
TFDP1 JUN 2
JUN JUNB 1
CTCF JUNB 2
TFDP1 JUNB 2
CTCF FOS 2
TFDP1 FOS 2
NFYB FOS 2
CEBPB FOS 2
EGR1 FOS 2
FOSB FOS 2
JUNB CTCF 2
FOS CTCF 2
JUN TFDP1 2
JUNB TFDP1 2
FOS TFDP1 2
KLF6 TFDP1 2
FOS NFYB 2
TFDP1 KLF6 2
FOS CEBPB 2
CTCF SOX4 2
E2F1 SOX4 2
CREM SOX4 2
SOX4 E2F1 2
JUNB CREM 2
FOS CREM 2
FOS EGR1 2
FOS FOSB 2
TFDP1 BHLHE40 2
JUNB MYBL2 2
FOS HES6 2
JUNB ATF7 2
FOS ATF7 2
CREM FOXP1 2
JUNB SPDEF 2
CEBPB SPDEF 2
SOX4 SPDEF 2
FOS ZNF76 2
CEBPB HOXA5 2
CEBPB CUX1 2
FOS HOXC9 2
BHLHE40 HOXC9 2
JUN MYB 2
FOSB NFATC3 2
CEBPB ZNF672 2
JUNB ARID3A 2
TFDP1 FOSL1 2
CEBPB TFAP2A 2
FOS DLX4 2
