# Supplementary material for: Toward Modeling Context-Specific EMT Regulatory Networks Using Temporal Single Cell RNA-Seq Data
Source: Front Mol Biosci. 2020 Apr 23;7:54. doi: 10.3389/fmolb.2020.00054 (PMC7190801; doi:10.3389/fmolb.2020.00054)
Supplement: Supplementary file 2 [file Data_Sheet_1.ZIP › SI_Networks/MCF7_TGFB1_0.2_0.25Interactions.txt]

Source Target Type
SOX4 KLF6 1
JUNB KLF6 1
JUN KLF6 1
TP63 KLF6 1
MAF KLF6 1
TFDP1 KLF6 2
ATF3 KLF6 1
BHLHE40 KLF6 1
ZNF217 KLF6 1
KLF6 SOX4 1
JUNB SOX4 1
SOX9 SOX4 1
TP63 SOX4 1
MAF SOX4 1
STAT1 SOX4 1
EGR1 SOX4 1
BHLHE40 SOX4 1
TGIF1 SOX4 1
ZNF217 SOX4 1
HIF1A SOX4 1
VEZF1 SOX4 1
KLF6 JUNB 1
NFE2L1 JUNB 1
JUN JUNB 1
TP63 JUNB 1
MAF JUNB 1
ATF3 JUNB 1
CEBPB JUNB 1
EGR1 JUNB 1
BHLHE40 JUNB 1
ELF3 JUNB 1
FOSB JUNB 1
KLF4 JUNB 1
ETS2 JUNB 1
ESRRA JUNB 1
MAFB JUNB 1
JUNB NFE2L1 1
SOX4 SOX9 1
KLF6 JUN 1
JUNB JUN 1
ATF3 JUN 1
EGR1 JUN 1
BHLHE40 JUN 1
ELF3 JUN 1
DDIT3 JUN 1
FOSB JUN 1
SOX4 TP63 1
JUNB TP63 1
BHLHE40 TP63 1
KLF6 MAF 1
SOX4 MAF 1
JUNB MAF 1
BHLHE40 MAF 1
KLF6 TFDP1 2
JUN TFDP1 2
CEBPB ATF3 1
STAT1 IRF9 1
IRF9 IRF7 1
STAT1 IRF7 1
IRF9 STAT1 1
IRF7 STAT1 1
JUNB CEBPB 1
ATF3 CEBPB 1
ATF4 CEBPB 1
DDIT3 CEBPB 1
KLF4 CEBPB 1
KLF6 EGR1 1
SOX4 EGR1 1
JUNB EGR1 1
JUN EGR1 1
JUNB ATF4 1
CEBPB ATF4 1
ESRRA ATF4 1
KLF6 BHLHE40 1
JUNB BHLHE40 1
TP63 BHLHE40 1
MAF BHLHE40 1
ATF3 BHLHE40 1
FOSB BHLHE40 1
KLF6 ELF3 1
SOX4 TGIF1 1
JUNB TGIF1 1
JUNB DDIT3 1
JUN DDIT3 1
CEBPB DDIT3 1
FOS DDIT3 1
JUNB FOSB 1
JUN FOSB 1
EGR1 FOSB 1
SOX4 ZNF217 1
SOX4 HIF1A 1
DDIT3 FOS 1
FOXO3 FOS 1
JUNB KLF4 1
JUN KLF4 1
CEBPB KLF4 1
FOS FOXO3 1
JUNB ETS2 1
JUNB ESRRA 1
ATF4 ESRRA 1
TFDP1 XBP1 1
KLF6 VEZF1 1
SOX4 VEZF1 1
JUNB VEZF1 1
JUNB MAFB 1
JUNB BATF 1
KLF6 MYBL2 2
CREM MYBL2 1
SOX4 KLF3 1
XBP1 ELF1 1
JUNB TFAP2A 1
KLF6 SMAD3 1
SOX4 SMAD3 1
SOX4 FOXP1 1
SOX4 NR2F2 1
