# Supplementary material for: Toward Modeling Context-Specific EMT Regulatory Networks Using Temporal Single Cell RNA-Seq Data
Source: Front Mol Biosci. 2020 Apr 23;7:54. doi: 10.3389/fmolb.2020.00054 (PMC7190801; doi:10.3389/fmolb.2020.00054)
Supplement: Supplementary file 2 [file Data_Sheet_1.ZIP › SI_Networks/MCF7_TNF_0.15_0.1Interactions.txt]

Source Target Type
STAT2 STAT1 1
IRF7 STAT1 1
KLF10 STAT1 1
KLF6 STAT1 1
IRF1 STAT1 1
IRF9 STAT1 1
STAT1 STAT2 1
IRF7 STAT2 1
STAT1 IRF7 1
STAT2 IRF7 1
IRF1 IRF7 1
IRF9 IRF7 1
JUNB JUN 1
BATF JUN 1
KLF6 JUN 1
ATF3 JUN 1
BHLHE40 JUN 1
ATF4 JUN 1
FOS JUN 1
MAF JUN 1
NFE2L1 JUN 1
MYC JUN 1
EGR1 JUN 1
TGIF1 JUN 1
DDIT3 JUN 1
KLF4 JUN 1
STAT1 JUNB 1
IRF7 JUNB 1
JUN JUNB 1
BATF JUNB 1
SOX4 JUNB 1
KLF10 JUNB 1
KLF6 JUNB 1
CEBPB JUNB 1
IRF1 JUNB 1
ATF3 JUNB 1
BHLHE40 JUNB 1
ATF4 JUNB 1
ETS2 JUNB 1
FOS JUNB 1
MAF JUNB 1
NFE2L1 JUNB 1
MYC JUNB 1
EGR1 JUNB 1
RELB JUNB 1
TGIF1 JUNB 1
FOSB JUNB 1
PPARG JUNB 1
FOXA1 JUNB 1
STAT1 BATF 1
JUNB BATF 1
SOX4 BATF 1
KLF6 BATF 1
IRF1 BATF 1
BHLHE40 BATF 1
STAT1 SOX4 1
STAT2 SOX4 1
JUN SOX4 1
JUNB SOX4 1
KLF10 SOX4 1
KLF6 SOX4 1
CEBPB SOX4 1
ATF3 SOX4 1
BHLHE40 SOX4 1
ATF4 SOX4 1
ETS2 SOX4 1
FOS SOX4 1
SMAD3 SOX4 1
TGIF1 SOX4 1
SOX9 SOX4 1
STAT1 KLF10 1
JUNB KLF10 1
SOX4 KLF10 1
KLF6 KLF10 1
IRF1 KLF10 1
BHLHE40 KLF10 1
ETS2 KLF10 1
FOS KLF10 1
RELB KLF10 1
STAT1 KLF6 1
JUN KLF6 1
JUNB KLF6 1
BATF KLF6 1
SOX4 KLF6 1
KLF10 KLF6 1
ATF3 KLF6 1
ATF4 KLF6 1
FOS KLF6 1
MAF KLF6 1
EGR1 KLF6 1
RELB KLF6 1
TP63 KLF6 1
FOXO1 KLF6 1
MAFK KLF6 1
JUNB CEBPB 1
BATF CEBPB 1
ATF4 CEBPB 1
MYC CEBPB 1
RELB CEBPB 1
CEBPG CEBPB 1
DDIT3 CEBPB 1
NR3C1 CEBPB 1
STAT1 IRF1 1
IRF7 IRF1 1
JUNB IRF1 1
KLF10 IRF1 1
ATF3 IRF1 1
BHLHE40 IRF1 1
ETS2 IRF1 1
NFE2L1 IRF1 1
RELB IRF1 1
JUNB ATF3 1
SOX4 ATF3 1
KLF6 ATF3 1
IRF1 ATF3 1
BHLHE40 ATF3 1
FOS ATF3 1
MYC ATF3 1
CEBPB NFE2L2 1
JUN BHLHE40 1
JUNB BHLHE40 1
BATF BHLHE40 1
KLF10 BHLHE40 1
IRF1 BHLHE40 1
ATF3 BHLHE40 1
ATF4 BHLHE40 1
ETS2 BHLHE40 1
NFE2L1 BHLHE40 1
HIF1A BHLHE40 1
JUN ATF4 1
JUNB ATF4 1
KLF6 ATF4 1
CEBPB ATF4 1
IRF1 ATF4 1
BHLHE40 ATF4 1
ETS2 ATF4 1
MYC ATF4 1
CEBPB NFKB2 1
ESRRA NFKB2 1
JUNB ETS2 1
KLF10 ETS2 1
CEBPB ETS2 1
ATF4 ETS2 1
NFE2L1 ETS2 1
STAT1 FOS 1
JUN FOS 1
JUNB FOS 1
BATF FOS 1
ATF3 FOS 1
ATF4 FOS 1
EGR1 FOS 1
GATA3 FOS 1
TFDP1 FOS 2
CTCF FOS 2
JUNB SMAD3 1
SOX4 SMAD3 1
JUN MAF 1
JUNB MAF 1
SOX4 MAF 1
KLF6 MAF 1
BHLHE40 MAF 1
RFX3 ESRRA 1
STAT1 IRF9 1
STAT1 NFE2L1 1
JUNB NFE2L1 1
BHLHE40 NFE2L1 1
ETS2 NFE2L1 1
MYC NFE2L1 1
JUN MYC 1
JUNB MYC 1
CEBPB MYC 1
ATF3 MYC 1
ATF4 MYC 1
STAT1 SPDEF 2
XBP1 SPDEF 1
SPDEF XBP1 1
JUN EGR1 1
KLF6 EGR1 1
BHLHE40 EGR1 1
FOS EGR1 1
FOSB EGR1 1
JUNB RELB 1
KLF10 RELB 1
CEBPB RELB 1
IRF1 RELB 1
NFKB2 RELB 1
FOS RELB 1
JUNB CEBPG 1
CEBPB CEBPG 1
JUN TGIF1 1
JUNB TGIF1 1
SOX4 TGIF1 1
KLF6 TGIF1 1
CEBPB TGIF1 1
BHLHE40 TGIF1 1
MYC TGIF1 1
JUNB FOSB 1
CEBPB FOSB 1
NFE2L2 FOSB 1
ESRRA FOSB 1
EGR1 FOSB 1
EGR3 FOSB 1
MYC EGR3 1
FOSB EGR3 1
JUNB TP63 1
JUNB PPARG 1
CEBPB PPARG 1
KLF6 FOXO1 1
JUN DDIT3 1
JUNB DDIT3 1
KLF6 DDIT3 1
CEBPB DDIT3 1
ETS2 DDIT3 1
MYC DDIT3 1
SOX4 SOX9 1
JUN KLF4 1
RELB RFX3 1
CEBPB NR3C1 1
JUNB MAFK 1
SOX4 FOXA1 1
FOS FOXA1 1
FOS GATA3 1
JUNB HIF1A 1
IRF7 TFDP1 2
JUN TFDP1 2
FOS TFDP1 2
FOS CTCF 2
JUNB EPAS1 1
CEBPB EPAS1 1
BHLHE40 EPAS1 1
ETS2 CREB3 1
KLF6 KLF7 1
JUN FOSL2 1
JUNB FOSL2 1
IRF7 ZFX 1
CEBPB ZFP62 1
ESRRA MLX 1
RELB NFYB 1
CEBPB RUNX2 1
MYC SP3 1
JUNB E2F8 2
CEBPB THAP11 2
STAT1 MYBL2 2
BHLHE40 IRX3 2
FOS IRX3 2
