# Supplementary material for: Toward Modeling Context-Specific EMT Regulatory Networks Using Temporal Single Cell RNA-Seq Data
Source: Front Mol Biosci. 2020 Apr 23;7:54. doi: 10.3389/fmolb.2020.00054 (PMC7190801; doi:10.3389/fmolb.2020.00054)
Supplement: Supplementary file 2 [file Data_Sheet_1.ZIP › SI_Networks/OVCA420_EGF_0.25_0.15Interactions.txt]

Source Target Type
FOSL1 ETS1 1
MEF2A ETS1 1
ELK3 ETS1 1
RELB ETS1 1
SOX4 ETS1 1
KLF6 ETS1 1
KLF7 ETS1 1
ETS1 FOSL1 1
JUNB FOSL1 1
MEF2A FOSL1 1
ELK3 FOSL1 1
RELB FOSL1 1
ETS2 FOSL1 1
TP63 FOSL1 1
IRF3 FOSL1 1
CEBPB FOSL1 1
MAX FOSL1 1
FOSL1 JUNB 1
ETS2 JUNB 1
BHLHE40 JUNB 1
FOSB JUNB 1
ETS1 MEF2A 1
ELK3 MEF2A 1
ETS1 ELK3 1
FOSL1 ELK3 1
JUNB ELK3 1
MEF2A ELK3 1
RELB ELK3 1
ETS2 ELK3 1
KLF6 ELK3 1
CEBPB ELK3 1
NFKB1 ELK3 1
FLI1 ELK3 1
SPDEF ELK3 1
IRF6 ELK3 1
FOSL1 RELB 1
KLF6 RELB 1
CEBPB RELB 1
BHLHE40 RELB 1
BACH1 RELB 1
FOSL1 ETS2 1
JUNB ETS2 1
SOX4 ETS2 1
KLF6 ETS2 1
CEBPB ETS2 1
ETS2 TP63 1
KLF6 TP63 1
SPDEF TP63 1
RELB IRF3 1
ETS1 SOX4 1
ELK3 SOX4 1
RELB SOX4 1
ETS2 SOX4 1
KLF6 SOX4 1
KLF7 SOX4 1
BHLHE40 SOX4 1
HIF1A SOX4 1
FOSL1 KLF6 1
MEF2A KLF6 1
RELB KLF6 1
TP63 KLF6 1
SOX4 KLF6 1
CEBPB KLF6 1
FOSL1 CEBPB 1
MEF2A CEBPB 1
ETS1 NFKB1 1
RELB NFKB1 1
ETS2 NFKB1 1
FOSL1 MAX 1
ELK3 MAX 1
ELK3 FLI1 1
JUNB KLF7 1
ETS2 KLF7 1
ETS1 SPDEF 1
FOSL1 SPDEF 1
RELB SPDEF 1
ETS2 SPDEF 1
TP63 SPDEF 1
ETS1 BHLHE40 1
RELB BHLHE40 1
KLF6 BHLHE40 1
JUNB FOSB 1
FOSL1 HIF1A 1
SOX4 HIF1A 1
ELK3 IRF6 1
RELB IRF6 1
RELB BACH1 1
ETS1 BNC2 1
FOSL1 BNC2 1
SPDEF BNC2 1
FOSL1 AR 1
ELK3 FOSL2 1
JUNB GTF2B 1
FOSL1 FOXS1 1
IRF3 HIVEP1 1
BHLHE40 KLF5 1
JUNB TFDP1 2
SOX4 NFE2L3 2
