# Supplementary material for: Toward Modeling Context-Specific EMT Regulatory Networks Using Temporal Single Cell RNA-Seq Data
Source: Front Mol Biosci. 2020 Apr 23;7:54. doi: 10.3389/fmolb.2020.00054 (PMC7190801; doi:10.3389/fmolb.2020.00054)
Supplement: Supplementary file 2 [file Data_Sheet_1.ZIP › SI_Networks/OVCA420_TGFB1_0.4_0.1Interactions.txt]

Source Target Type
JUNB ETS1 1
TP63 ETS1 1
ELK3 ETS1 1
ATF4 ETS1 1
SOX4 ETS1 1
JUNB JUN 1
ETS1 JUNB 1
JUN JUNB 1
ELK3 JUNB 1
HMGA1 JUNB 2
ETS1 FOSL1 1
TP63 FOSL1 1
ELK3 TP63 1
ETS1 RELB 1
FOSL1 RELB 1
KLF6 RELB 1
ETS1 ELK3 1
JUNB ELK3 1
TP63 ELK3 1
RELB ELK3 1
KLF6 ELK3 1
RUNX1 ELK3 1
NR2F2 ELK3 2
ETS1 ATF4 1
ETS1 SOX4 1
ELK3 SOX4 1
ETS1 KLF6 1
RELB KLF6 1
ATF4 KLF6 1
HMGA2 KLF6 1
ETS1 HMGA2 1
RELB HMGA2 1
FOSL1 RUNX1 1
ELK3 RUNX1 1
MYC CEBPB 2
KLF6 MYC 2
MYBL2 MYC 2
FOSL1 MYBL2 2
RELB NR2F2 2
ELK3 NR2F2 2
ETS1 HMGA1 2
JUNB HMGA1 2
FOSL1 PPARG 1
FOSL1 MXD1 1
ETS1 PITX1 2
CEBPB E2F4 2
RELB ESRRA 2
ELK3 ESR1 2
ETS1 NFYB 2
ELK3 NFYB 2
FOSL1 KLF5 2
ETS1 TFDP2 2
ELK3 NFE2L2 2
MYC MGA 2
MYC KLF9 2
