# Supplementary material for: Toward Modeling Context-Specific EMT Regulatory Networks Using Temporal Single Cell RNA-Seq Data
Source: Front Mol Biosci. 2020 Apr 23;7:54. doi: 10.3389/fmolb.2020.00054 (PMC7190801; doi:10.3389/fmolb.2020.00054)
Supplement: Supplementary file 2 [file Data_Sheet_1.ZIP › SI_Networks/OVCA420_TNF_0.15_0.05Interactions.txt]

Source Target Type
TP63 FOSL1 1
ELK3 FOSL1 1
ETS1 FOSL1 1
CEBPB FOSL1 1
JUNB FOSL1 1
ETS2 FOSL1 1
MAFK FOSL1 1
FOS FOSL1 1
KLF3 FOSL1 1
FOSL1 TP63 1
ELK3 TP63 1
ETS1 TP63 1
FOSB TP63 1
JUNB TP63 1
STAT3 TP63 1
KLF6 TP63 1
BHLHE40 TP63 1
FOSL1 ELK3 1
TP63 ELK3 1
ETS1 ELK3 1
ETS2 ELK3 1
IRF6 ELK3 1
HIVEP1 ELK3 1
MAFF ELK3 1
RELB ELK3 1
KLF6 ELK3 1
BACH1 ELK3 1
BHLHE40 ELK3 1
RUNX1 ELK3 1
FOSL1 ETS1 1
TP63 ETS1 1
ELK3 ETS1 1
CEBPB ETS1 1
SPDEF ETS1 1
JUN ETS1 1
JUNB ETS1 1
CUX1 ETS1 1
BHLHE40 ETS1 1
JUN FOSB 1
JUNB FOSB 1
FOS FOSB 1
JUNB CEBPB 1
XBP1 CEBPB 2
NFE2L2 MYC 1
XBP1 MYC 1
MYBL2 MYC 2
TFDP1 MYC 2
ZNF768 MYC 2
MYC NFE2L2 1
FOSL1 SPDEF 1
ETS1 SPDEF 1
FOSB JUN 1
JUNB JUN 1
GTF2B JUN 1
FOS JUN 1
YBX1 JUN 2
FOSL1 JUNB 1
ETS1 JUNB 1
FOSB JUNB 1
CEBPB JUNB 1
JUN JUNB 1
GTF2B JUNB 1
RELB JUNB 1
MYBL2 JUNB 2
TFDP1 JUNB 2
FOSL1 ETS2 1
ETS1 ETS2 1
MYC ETS2 2
NR2F2 ETS2 1
JUNB GTF2B 1
FOSL1 MAFK 1
FOSL1 IRF6 1
ELK3 IRF6 1
ETS1 IRF6 1
ELK3 STAT3 1
FOSL1 FOS 1
FOSB FOS 1
JUN FOS 1
ATF3 FOS 1
ELK3 HIVEP1 1
CEBPB MAFF 1
ETS1 CUX1 1
FOSL1 RELB 1
ETS1 RELB 1
JUNB RELB 1
TP63 KLF6 1
FOSB KLF6 1
FOSL1 BACH1 1
ELK3 BACH1 1
FOSL1 BHLHE40 1
ELK3 BHLHE40 1
ETS1 BHLHE40 1
CEBPB BHLHE40 1
MYC ATF3 2
FOS ATF3 1
FOSL1 RUNX1 1
ELK3 RUNX1 1
ETS1 RUNX1 1
RELB NR2F2 1
JUNB MYBL2 2
JUNB TFDP1 2
ETS1 YBX1 2
MYC ZNF768 2
CEBPB RELA 1
ETS2 SOX17 1
FOSL1 AR 1
ELK3 ATF5 1
ELK3 SOX4 1
MYC SOX4 2
ETS2 SOX4 1
CEBPB NFKB1 1
JUNB HEY1 1
ETS2 DDIT3 1
FOSL1 HNF1B 1
MYC PRDM16 1
CEBPB ONECUT1 2
JUNB ETV2 2
TFDP1 NFE2L3 2
STAT3 BATF 2
TFDP1 IRF1 2
JUNB MAX 2
